# Supplementary material for: The maize leaf lipidome shows multilevel genetic control and high predictive value for agronomic traits
Source: PubMed Central journal article supplement (PMC3748857; doi:10.1038/srep02479), 2013-08-21
Supplement: srep02479-s1.pdf [file srep02479-s1.pdf]

## Supplementary Information for

# The maize leaf lipidome shows multilevel genetic control and high predictive value for agronomic traits

Christian Riedelsheimer<sup>1,3</sup>, Yariv Brotman<sup>2,3</sup>, Michaël Méret<sup>2,3</sup>, Albrecht E. Melchinger<sup>1</sup>, Lothar Willmitzer<sup>2\*</sup>.

<sup>1</sup>Institute of Plant Breeding, Seed Science and Population Genetics, University of Hohenheim, Fruwirthstr. 21, 70593 Stuttgart, Germany

<sup>2</sup>Max-Planck Institute of Molecular Plant Physiology, Am Mühlenberg 1, 14476 Potsdam, Germany

<sup>3</sup>These authors contributed equally

\*Corresponding author:

Lothar Willmitzer

Max Planck Institute of Molecular Plant Physiology

Am Mühlenberg 1

14476 Potsdam

Germany

Phone: +49 (331) 567 8202

Fax: +49 (331) 567 8201

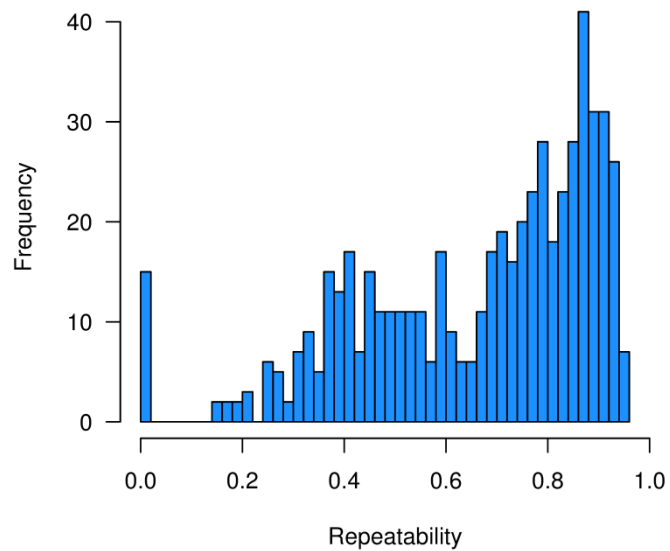

**Supplementary Fig. S1** Histogram showing the repeatabilities of the measured lipids.

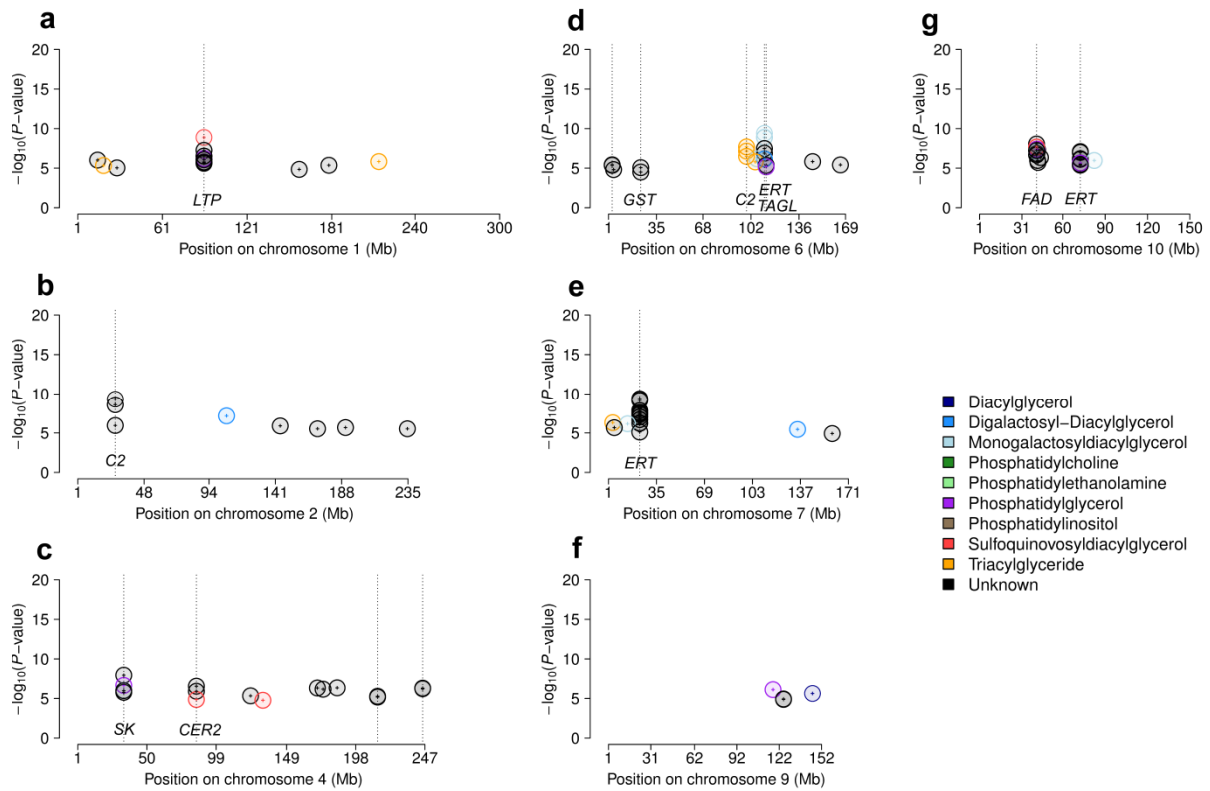

**Supplementary Fig. S2** Colocalization pattern of GWA mapping hits on chromosomes 1 (a), 2 (b), 4 (c), 6 (d), 7 (e), 9 (f), and 10 (g). Center of circles refer to  $-\log_{10}(P\text{-value})$  of SNP-lipid associations which were significant with  $FDR \leq 0.025$ . Dotted lines indicate genomic positions with association signals of multiple lipids. Candidate genes with known relationships to lipid metabolism or protection against peroxidation are shown on the bottom. *LTP*, lipid transfer protein; *C2*, C2  $Ca^{2+}$ /lipid-binding domain-containing protein; *SK*, sphingosine kinase; *CER2*, CER2 fatty acid elongase-like protein; *GST*, Glutathion-S-transferase; *ERT*, ethylen-responsive transcription factor; *TAGL*, triacylglycerol lipase; *FAD*, fatty acid desaturase. Details of all association hits can be found in Table S2 and candidate genes in Table 1. Colocalizations on chromosomes 3, 5, and 8 can be found in Fig. 1b-d.

**Supplementary Table S1** Descriptive details of the measured lipids.

| <b>Lipid ID</b> | <b>Compound</b> | <b>Lipid class</b> | <b>Intensity mean</b> | <b>Formula</b> | <b>Adduct</b> | <b>Measured m/z</b> | <b>Monoisotopic mass</b> | <b>Mass ppm error</b> |
|-----------------|-----------------|--------------------|-----------------------|----------------|---------------|---------------------|--------------------------|-----------------------|
| 866             | NA              | NA                 | 318910.28             | NA             | NA            | 198.45              | NA                       | NA                    |
| 1647            | NA              | NA                 | 1752720.85            | NA             | NA            | 223.39              | NA                       | NA                    |
| 1735            | NA              | NA                 | 494996.90             | NA             | NA            | 226.88              | NA                       | NA                    |
| 1869            | NA              | NA                 | 1686886.33            | NA             | NA            | 233.16              | NA                       | NA                    |
| 1874            | NA              | NA                 | 885255.02             | NA             | NA            | 233.41              | NA                       | NA                    |
| 1879            | NA              | NA                 | 467179.50             | NA             | NA            | 233.66              | NA                       | NA                    |
| 1887            | NA              | NA                 | 251565.07             | NA             | NA            | 233.91              | NA                       | NA                    |
| 1901            | NA              | NA                 | 270328.72             | NA             | NA            | 234.40              | NA                       | NA                    |
| 1913            | NA              | NA                 | 238832.99             | NA             | NA            | 234.90              | NA                       | NA                    |
| 1995            | NA              | NA                 | 4753214.19            | NA             | NA            | 238.65              | NA                       | NA                    |
| 2003            | NA              | NA                 | 2560760.70            | NA             | NA            | 238.90              | NA                       | NA                    |
| 2008            | NA              | NA                 | 845783.49             | NA             | NA            | 239.16              | NA                       | NA                    |
| 2013            | NA              | NA                 | 258472.69             | NA             | NA            | 239.16              | NA                       | NA                    |
| 2019            | NA              | NA                 | 248284.15             | NA             | NA            | 239.41              | NA                       | NA                    |
| 2020            | NA              | NA                 | 142800.27             | NA             | NA            | 239.41              | NA                       | NA                    |
| 2024            | NA              | NA                 | 185076.13             | NA             | NA            | 239.66              | NA                       | NA                    |
| 2026            | NA              | NA                 | 224049.55             | NA             | NA            | 239.89              | NA                       | NA                    |
| 2033            | NA              | NA                 | 481581.16             | NA             | NA            | 240.17              | NA                       | NA                    |
| 2036            | NA              | NA                 | 167836.32             | NA             | NA            | 240.40              | NA                       | NA                    |
| 2040            | NA              | NA                 | 269808.99             | NA             | NA            | 240.42              | NA                       | NA                    |
| 2074            | NA              | NA                 | 253317.27             | NA             | NA            | 241.40              | NA                       | NA                    |
| 2129            | NA              | NA                 | 154093.43             | NA             | NA            | 243.41              | NA                       | NA                    |
| 2223            | NA              | NA                 | 275474.16             | NA             | NA            | 248.91              | NA                       | NA                    |
| 2230            | NA              | NA                 | 153125.27             | NA             | NA            | 249.16              | NA                       | NA                    |
| 2937            | NA              | NA                 | 160215.82             | NA             | NA            | 378.03              | NA                       | NA                    |
| 3011            | NA              | NA                 | 829686.07             | NA             | NA            | 391.77              | NA                       | NA                    |

|      |    |    |            |    |    |        |    |    |
|------|----|----|------------|----|----|--------|----|----|
| 3012 | NA | NA | 819597.00  | NA | NA | 392.02 | NA | NA |
| 3013 | NA | NA | 417667.91  | NA | NA | 392.27 | NA | NA |
| 3014 | NA | NA | 146608.88  | NA | NA | 392.53 | NA | NA |
| 3225 | NA | NA | 198669.20  | NA | NA | 435.54 | NA | NA |
| 3226 | NA | NA | 252110.53  | NA | NA | 435.79 | NA | NA |
| 3227 | NA | NA | 156809.16  | NA | NA | 436.04 | NA | NA |
| 3268 | NA | NA | 472003.15  | NA | NA | 446.52 | NA | NA |
| 3269 | NA | NA | 642152.04  | NA | NA | 446.77 | NA | NA |
| 3270 | NA | NA | 580983.74  | NA | NA | 447.02 | NA | NA |
| 3273 | NA | NA | 359732.07  | NA | NA | 447.27 | NA | NA |
| 3351 | NA | NA | 169905.57  | NA | NA | 473.05 | NA | NA |
| 3573 | NA | NA | 158329.70  | NA | NA | 535.43 | NA | NA |
| 3576 | NA | NA | 221969.50  | NA | NA | 535.43 | NA | NA |
| 3586 | NA | NA | 526893.22  | NA | NA | 536.44 | NA | NA |
| 3599 | NA | NA | 590267.73  | NA | NA | 537.53 | NA | NA |
| 3681 | NA | NA | 3156432.15 | NA | NA | 549.49 | NA | NA |
| 3698 | NA | NA | 3863510.50 | NA | NA | 551.43 | NA | NA |
| 3700 | NA | NA | 2281107.78 | NA | NA | 551.42 | NA | NA |
| 3709 | NA | NA | 1055638.64 | NA | NA | 551.50 | NA | NA |
| 3769 | NA | NA | 309128.32  | NA | NA | 559.51 | NA | NA |
| 3809 | NA | NA | 155721.18  | NA | NA | 565.41 | NA | NA |
| 3817 | NA | NA | 1555451.26 | NA | NA | 565.57 | NA | NA |
| 3829 | NA | NA | 280852.16  | NA | NA | 567.42 | NA | NA |
| 3842 | NA | NA | 1242670.46 | NA | NA | 568.43 | NA | NA |
| 3844 | NA | NA | 688373.26  | NA | NA | 568.43 | NA | NA |
| 3847 | NA | NA | 674438.87  | NA | NA | 568.43 | NA | NA |
| 3859 | NA | NA | 653452.33  | NA | NA | 569.43 | NA | NA |
| 3884 | NA | NA | 6755518.82 | NA | NA | 571.47 | NA | NA |
| 3897 | NA | NA | 1465958.94 | NA | NA | 573.49 | NA | NA |

|      |              |                |            |          |                    |        |        |      |
|------|--------------|----------------|------------|----------|--------------------|--------|--------|------|
| 3898 | NA           | NA             | 558657.87  | NA       | NA                 | 573.49 | NA     | NA   |
| 3899 | NA           | NA             | 447333.24  | NA       | NA                 | 573.49 | NA     | NA   |
| 3901 | NA           | NA             | 288687.45  | NA       | NA                 | 573.49 | NA     | NA   |
| 3907 | NA           | NA             | 305045.03  | NA       | NA                 | 573.49 | NA     | NA   |
| 3908 | NA           | NA             | 165984.84  | NA       | NA                 | 573.49 | NA     | NA   |
| 3909 | NA           | NA             | 197845.32  | NA       | NA                 | 573.49 | NA     | NA   |
| 3915 | NA           | NA             | 443649.51  | NA       | NA                 | 575.50 | NA     | NA   |
| 3917 | NA           | NA             | 179528.79  | NA       | NA                 | 575.50 | NA     | NA   |
| 3918 | NA           | NA             | 281937.70  | NA       | NA                 | 575.50 | NA     | NA   |
| 3920 | NA           | NA             | 151333.60  | NA       | NA                 | 575.50 | NA     | NA   |
| 3926 | NA           | NA             | 169612.05  | NA       | NA                 | 575.50 | NA     | NA   |
| 3941 | NA           | NA             | 249848.20  | NA       | NA                 | 577.52 | NA     | NA   |
| 3942 | NA           | NA             | 194510.93  | NA       | NA                 | 577.52 | NA     | NA   |
| 3978 | NA           | NA             | 366099.83  | NA       | NA                 | 583.42 | NA     | NA   |
| 3979 | NA           | NA             | 307632.47  | NA       | NA                 | 583.42 | NA     | NA   |
| 3981 | NA           | NA             | 189053.37  | NA       | NA                 | 583.42 | NA     | NA   |
| 3988 | NA           | NA             | 173864.76  | NA       | NA                 | 584.42 | NA     | NA   |
| 4001 | NA           | NA             | 2532884.99 | NA       | NA                 | 585.43 | NA     | NA   |
| 4002 | NA           | NA             | 605509.73  | NA       | NA                 | 585.43 | NA     | NA   |
| 4003 | NA           | NA             | 385311.18  | NA       | NA                 | 585.43 | NA     | NA   |
| 4004 | NA           | NA             | 1070527.91 | NA       | NA                 | 585.43 | NA     | NA   |
| 4013 | DAG 34:5 (2) | Diacylglycerol | 11453.31   | C37H62O5 | [M+H] <sup>+</sup> | 587.47 | 586.46 | 3.08 |
| 4018 | NA           | NA             | 786855.28  | NA       | NA                 | 587.55 | NA     | NA   |
| 4030 | DAG 34:4 (2) | Diacylglycerol | 6823.54    | C37H64O5 | [M+H] <sup>+</sup> | 589.48 | 588.48 | 1.68 |
| 4035 | NA           | NA             | 195037.60  | NA       | NA                 | 590.55 | NA     | NA   |
| 4046 | DAG 34:3 (3) | Diacylglycerol | 1872445.37 | C37H66O5 | [M+H] <sup>+</sup> | 591.50 | 590.49 | 0.33 |
| 4047 | DAG 34:3 (2) | Diacylglycerol | 1246047.34 | C37H66O5 | [M+H] <sup>+</sup> | 591.50 | 590.49 | 0.12 |
| 4067 | DAG 34:2 (2) | Diacylglycerol | 101290.57  | C37H68O5 | [M+H] <sup>+</sup> | 593.51 | 592.51 | 0.56 |
| 4070 | NA           | NA             | 769803.35  | NA       | NA                 | 593.60 | NA     | NA   |

|      |              |                |             |          |                    |        |        |      |
|------|--------------|----------------|-------------|----------|--------------------|--------|--------|------|
| 4082 | NA           | NA             | 592679.59   | NA       | NA                 | 595.47 | NA     | NA   |
| 4084 | NA           | NA             | 2238676.48  | NA       | NA                 | 595.47 | NA     | NA   |
| 4087 | DAG 34:1 (2) | Diacylglycerol | 7296.90     | C37H70O5 | [M+H] <sup>+</sup> | 595.53 | 594.52 | 1.84 |
| 4091 | NA           | NA             | 148547.65   | NA       | NA                 | 595.45 | NA     | NA   |
| 4092 | NA           | NA             | 161163.46   | NA       | NA                 | 595.47 | NA     | NA   |
| 4094 | NA           | NA             | 165931.96   | NA       | NA                 | 595.47 | NA     | NA   |
| 4098 | NA           | NA             | 626386.74   | NA       | NA                 | 595.59 | NA     | NA   |
| 4115 | NA           | NA             | 154786.91   | NA       | NA                 | 597.49 | NA     | NA   |
| 4121 | NA           | NA             | 196085.76   | NA       | NA                 | 597.49 | NA     | NA   |
| 4122 | NA           | NA             | 176741.65   | NA       | NA                 | 597.49 | NA     | NA   |
| 4123 | NA           | NA             | 183552.75   | NA       | NA                 | 597.49 | NA     | NA   |
| 4152 | NA           | NA             | 182056.86   | NA       | NA                 | 599.50 | NA     | NA   |
| 4183 | NA           | NA             | 178528.40   | NA       | NA                 | 601.43 | NA     | NA   |
| 4184 | NA           | NA             | 1125391.10  | NA       | NA                 | 601.43 | NA     | NA   |
| 4185 | NA           | NA             | 362235.50   | NA       | NA                 | 601.43 | NA     | NA   |
| 4187 | NA           | NA             | 3344492.94  | NA       | NA                 | 601.43 | NA     | NA   |
| 4188 | NA           | NA             | 1031239.71  | NA       | NA                 | 601.43 | NA     | NA   |
| 4189 | NA           | NA             | 2028794.06  | NA       | NA                 | 601.43 | NA     | NA   |
| 4190 | NA           | NA             | 771627.94   | NA       | NA                 | 601.43 | NA     | NA   |
| 4258 | NA           | NA             | 236122.59   | NA       | NA                 | 608.53 | NA     | NA   |
| 4281 | NA           | NA             | 178036.37   | NA       | NA                 | 610.62 | NA     | NA   |
| 4285 | NA           | NA             | 239114.62   | NA       | NA                 | 611.47 | NA     | NA   |
| 4298 | NA           | NA             | 317801.51   | NA       | NA                 | 611.56 | NA     | NA   |
| 4299 | NA           | NA             | 251415.97   | NA       | NA                 | 611.56 | NA     | NA   |
| 4313 | NA           | NA             | 156763.82   | NA       | NA                 | 613.48 | NA     | NA   |
| 4315 | DAG 36:6 (3) | Diacylglycerol | 6038020.53  | C39H64O5 | [M+H] <sup>+</sup> | 613.48 | 612.48 | 0.38 |
| 4316 | DAG 36:6 (2) | Diacylglycerol | 20183834.79 | C39H64O5 | [M+H] <sup>+</sup> | 613.48 | 612.48 | 0.08 |
| 4343 | NA           | NA             | 515898.08   | NA       | NA                 | 615.24 | NA     | NA   |
| 4348 | DAG 36:5 (2) | Diacylglycerol | 1147835.77  | C39H66O5 | [M+H] <sup>+</sup> | 615.50 | 614.49 | 0.22 |

|      |              |                          |            |            |                      |        |        |      |
|------|--------------|--------------------------|------------|------------|----------------------|--------|--------|------|
| 4353 | NA           | NA                       | 357802.47  | NA         | NA                   | 615.58 | NA     | NA   |
| 4368 | DAG 36:4 (2) | Diacylglycerol           | 366623.04  | C39H68O5   | [M+H] <sup>+</sup>   | 617.51 | 616.51 | 0.36 |
| 4385 | NA           | NA                       | 521325.69  | NA         | NA                   | 619.53 | NA     | NA   |
| 4386 | DAG 36:3 (2) | Diacylglycerol           | 9418.57    | C39H70O5   | [M+H] <sup>+</sup>   | 619.53 | 618.52 | 1.18 |
| 4387 | NA           | NA                       | 217518.26  | NA         | NA                   | 619.53 | NA     | NA   |
| 4412 | NA           | NA                       | 1068165.83 | NA         | NA                   | 623.62 | NA     | NA   |
| 4436 | NA           | NA                       | 229810.04  | NA         | NA                   | 627.44 | NA     | NA   |
| 4461 | NA           | NA                       | 161393.52  | NA         | NA                   | 629.22 | NA     | NA   |
| 4482 | DAG 36:6 (1) | Diacylglycerol           | 476158.39  | C39H64O5   | [M+NH4] <sup>+</sup> | 630.51 | 612.48 | 0.17 |
| 4495 | DAG 36:5 (1) | Diacylglycerol           | 624741.82  | C39H66O5   | [M+NH4] <sup>+</sup> | 632.53 | 614.49 | 0.76 |
| 4509 | DAG 36:4 (1) | Diacylglycerol           | 167457.78  | C39H68O5   | [M+NH4] <sup>+</sup> | 634.54 | 616.51 | 1.48 |
| 4569 | DAG 36:3 (1) | Diacylglycerol           | 5829.30    | C39H70O5   | [M+Na] <sup>+</sup>  | 641.51 | 618.52 | 0.93 |
| 4579 | DAG 36:2 (1) | Diacylglycerol           | 5136.98    | C39H72O5   | [M+Na] <sup>+</sup>  | 643.53 | 620.54 | 1.20 |
| 4593 | NA           | NA                       | 168540.35  | NA         | NA                   | 645.47 | NA     | NA   |
| 4619 | NA           | NA                       | 798774.92  | NA         | NA                   | 651.65 | NA     | NA   |
| 4634 | NA           | NA                       | 193782.64  | NA         | NA                   | 654.60 | NA     | NA   |
| 4651 | NA           | NA                       | 184563.47  | NA         | NA                   | 657.43 | NA     | NA   |
| 4865 | NA           | NA                       | 746656.53  | NA         | NA                   | 682.63 | NA     | NA   |
| 4968 | NA           | NA                       | 390582.22  | NA         | NA                   | 696.54 | NA     | NA   |
| 5061 | NA           | NA                       | 376603.47  | NA         | NA                   | 708.51 | NA     | NA   |
| 5082 | PE 34:4 (1)  | Phosphatidylethanolamine | 5159.15    | C39H70NO8P | [M+H] <sup>+</sup>   | 712.49 | 711.48 | 2.01 |
| 5101 | PE 34:3 (1)  | Phosphatidylethanolamine | 3458073.59 | C39H72NO8P | [M+H] <sup>+</sup>   | 714.51 | 713.50 | 0.17 |
| 5103 | NA           | NA                       | 1291262.59 | NA         | NA                   | 714.55 | NA     | NA   |
| 5117 | PE 34:2 (1)  | Phosphatidylethanolamine | 3188295.26 | C39H74NO8P | [M+H] <sup>+</sup>   | 716.52 | 715.52 | 0.37 |
| 5135 | PE 34:1 (1)  | Phosphatidylethanolamine | 41067.16   | C39H76NO8P | [M+H] <sup>+</sup>   | 718.54 | 717.53 | 0.95 |
| 5160 | NA           | NA                       | 220573.69  | NA         | NA                   | 721.54 | NA     | NA   |
| 5162 | NA           | NA                       | 1131822.19 | NA         | NA                   | 721.50 | NA     | NA   |
| 5185 | NA           | NA                       | 358521.82  | NA         | NA                   | 723.52 | NA     | NA   |
| 5196 | NA           | NA                       | 230369.63  | NA         | NA                   | 724.57 | NA     | NA   |



|      |               |                              |            |            |                      |        |        |      |
|------|---------------|------------------------------|------------|------------|----------------------|--------|--------|------|
| 5206 | NA            | NA                           | 334856.33  | NA         | NA                   | 726.48 | NA     | NA   |
| 5208 | PC 32:4 (1)   | Phosphatidylcholine          | 4415.63    | C40H72NO8P | [M+H] <sup>+</sup>   | 726.51 | 725.50 | 0.34 |
| 5231 | NA            | NA                           | 330502.65  | NA         | NA                   | 730.54 | NA     | NA   |
| 5233 | PC 32:2 (1)   | Phosphatidylcholine          | 21165.07   | C40H76NO8P | [M+H] <sup>+</sup>   | 730.54 | 729.53 | 0.85 |
| 5235 | NA            | NA                           | 539303.13  | NA         | NA                   | 731.44 | NA     | NA   |
| 5283 | PE 36:6 (1)   | Phosphatidylethanolamine     | 1646485.41 | C41H70NO8P | [M+H] <sup>+</sup>   | 736.49 | 735.48 | 0.70 |
| 5285 | NA            | NA                           | 315019.43  | NA         | NA                   | 736.53 | NA     | NA   |
| 5286 | NA            | NA                           | 206246.18  | NA         | NA                   | 736.49 | NA     | NA   |
| 5304 | PE 36:5 (1)   | Phosphatidylethanolamine     | 3554120.54 | C41H72NO8P | [M+H] <sup>+</sup>   | 738.50 | 737.50 | 2.72 |
| 5305 | NA            | NA                           | 5166498.25 | NA         | NA                   | 738.53 | NA     | NA   |
| 5323 | PE 36:4 (1)   | Phosphatidylethanolamine     | 3914600.66 | C41H74NO8P | [M+H] <sup>+</sup>   | 740.52 | 739.52 | 0.79 |
| 5325 | NA            | NA                           | 1706703.86 | NA         | NA                   | 740.54 | NA     | NA   |
| 5344 | NA            | NA                           | 231044.94  | NA         | NA                   | 742.54 | NA     | NA   |
| 5345 | PE 36:3 (1)   | Phosphatidylethanolamine     | 92852.22   | C41H76NO8P | [M+H] <sup>+</sup>   | 742.54 | 741.53 | 1.66 |
| 5346 | NA            | NA                           | 245386.66  | NA         | NA                   | 742.54 | NA     | NA   |
| 5347 | NA            | NA                           | 742412.13  | NA         | NA                   | 742.58 | NA     | NA   |
| 5353 | NA            | NA                           | 231822.50  | NA         | NA                   | 743.44 | NA     | NA   |
| 5355 | NA            | NA                           | 3011676.53 | NA         | NA                   | 743.49 | NA     | NA   |
| 5360 | NA            | NA                           | 1225109.10 | NA         | NA                   | 743.48 | NA     | NA   |
| 5367 | NA            | NA                           | 169077.35  | NA         | NA                   | 744.55 | NA     | NA   |
| 5370 | PE 36:2 (1)   | Phosphatidylethanolamine     | 131606.27  | C41H78NO8P | [M+H] <sup>+</sup>   | 744.56 | 743.55 | 1.79 |
| 5376 | NA            | NA                           | 590558.52  | NA         | NA                   | 745.50 | NA     | NA   |
| 5377 | NA            | NA                           | 243645.51  | NA         | NA                   | 745.50 | NA     | NA   |
| 5382 | NA            | NA                           | 292760.90  | NA         | NA                   | 745.50 | NA     | NA   |
| 5394 | NA            | NA                           | 163531.33  | NA         | NA                   | 745.59 | NA     | NA   |
| 5395 | NA            | NA                           | 167103.42  | NA         | NA                   | 745.59 | NA     | NA   |
| 5430 | NA            | NA                           | 809795.70  | NA         | NA                   | 747.61 | NA     | NA   |
| 5447 | MGDG 32:0 (1) | Monogalactosyldiacylglycerol | 139328.76  | C41H78O10  | [M+NH4] <sup>+</sup> | 748.59 | 730.56 | 0.74 |
| 5456 | MGDG 32:2 (1) | Monogalactosyldiacylglycerol | 5896.27    | C41H74O10  | [M+Na] <sup>+</sup>  | 749.52 | 726.53 | 1.51 |

|      |               |                              |             |            |                      |        |        |      |
|------|---------------|------------------------------|-------------|------------|----------------------|--------|--------|------|
| 5458 | NA            | NA                           | 285468.87   | NA         | NA                   | 749.62 | NA     | NA   |
| 5462 | NA            | NA                           | 325918.87   | NA         | NA                   | 749.62 | NA     | NA   |
| 5473 | PC 34:6 (1)   | Phosphatidylcholine          | 2308.47     | C42H72NO8P | [M+H] <sup>+</sup>   | 750.51 | 749.50 | 1.96 |
| 5486 | MGDG 32:1 (1) | Monogalactosyldiacylglycerol | 14190.53    | C41H76O10  | [M+Na] <sup>+</sup>  | 751.53 | 728.54 | 0.58 |
| 5498 | PC 34:5 (1)   | Phosphatidylcholine          | 43291.16    | C42H74NO8P | [M+H] <sup>+</sup>   | 752.52 | 751.52 | 1.19 |
| 5503 | NA            | NA                           | 974769.76   | NA         | NA                   | 752.60 | NA     | NA   |
| 5513 | MGDG 32:0 (1) | Monogalactosyldiacylglycerol | 196812.75   | C41H78O10  | NA                   | 753.55 | 730.56 | 0.18 |
| 5522 | PC 34:4 (1)   | Phosphatidylcholine          | 104486.35   | C42H76NO8P | [M+H] <sup>+</sup>   | 754.54 | 753.53 | 2.04 |
| 5523 | PC 34:4 (2)   | Phosphatidylcholine          | 786508.41   | C42H76NO8P | NA                   | 754.54 | 753.53 | 0.83 |
| 5540 | NA            | NA                           | 277349.76   | NA         | NA                   | 756.43 | NA     | NA   |
| 5543 | PC 34:3 (1)   | Phosphatidylcholine          | 41584396.49 | C42H78NO8P | [M+H] <sup>+</sup>   | 756.55 | 755.55 | 0.74 |
| 5549 | NA            | NA                           | 300888.77   | NA         | NA                   | 756.68 | NA     | NA   |
| 5559 | NA            | NA                           | 316809.89   | NA         | NA                   | 757.52 | NA     | NA   |
| 5581 | NA            | NA                           | 191231.63   | NA         | NA                   | 758.45 | NA     | NA   |
| 5582 | PC 34:2 (1)   | Phosphatidylcholine          | 28887132.81 | C42H80NO8P | [M+H] <sup>+</sup>   | 758.57 | 757.56 | 0.37 |
| 5584 | NA            | NA                           | 202466.97   | NA         | NA                   | 758.70 | NA     | NA   |
| 5605 | PG 34:4 (2)   | Phosphatidylglycerol         | 17915610.93 | C40H71O10P | [M+NH4] <sup>+</sup> | 760.51 | 742.48 | 0.70 |
| 5613 | PC 34:1 (1)   | Phosphatidylcholine          | 2700594.83  | C42H82NO8P | [M+H] <sup>+</sup>   | 760.59 | 759.58 | 1.21 |
| 5642 | NA            | NA                           | 415494.63   | NA         | NA                   | 762.49 | NA     | NA   |
| 5645 | PG 34:3 (1)   | Phosphatidylglycerol         | 3682774.51  | C40H73O10P | [M+NH4] <sup>+</sup> | 762.53 | 744.49 | 0.07 |
| 5648 | PG 34:3 (2)   | Phosphatidylglycerol         | 1432513.35  | C40H73O10P | [M+NH4] <sup>+</sup> | 762.53 | 744.49 | 0.63 |
| 5651 | NA            | NA                           | 415308.28   | NA         | NA                   | 762.55 | NA     | NA   |
| 5656 | PC 34:0 (1)   | Phosphatidylcholine          | 778623.09   | C42H84NO8P | [M+H] <sup>+</sup>   | 762.60 | 761.59 | 0.85 |
| 5688 | PG 34:2 (1)   | Phosphatidylglycerol         | 895935.74   | C40H75O10P | [M+NH4] <sup>+</sup> | 764.54 | 746.51 | 0.67 |
| 5689 | NA            | NA                           | 310643.69   | NA         | NA                   | 764.54 | NA     | NA   |
| 5700 | NA            | NA                           | 414071.08   | NA         | NA                   | 765.47 | NA     | NA   |
| 5719 | NA            | NA                           | 184911.00   | NA         | NA                   | 765.62 | NA     | NA   |
| 5726 | NA            | NA                           | 249778.69   | NA         | NA                   | 766.56 | NA     | NA   |
| 5727 | PG 34:1 (1)   | Phosphatidylglycerol         | 498932.50   | C40H77O10P | [M+NH4] <sup>+</sup> | 766.56 | 748.53 | 1.28 |

|      |               |                              |             |            |                      |        |        |      |
|------|---------------|------------------------------|-------------|------------|----------------------|--------|--------|------|
| 5728 | NA            | NA                           | 288265.34   | NA         | NA                   | 766.56 | NA     | NA   |
| 5754 | NA            | NA                           | 351653.77   | NA         | NA                   | 767.48 | NA     | NA   |
| 5755 | NA            | NA                           | 274386.85   | NA         | NA                   | 767.51 | NA     | NA   |
| 5776 | MGDG 34:4 (1) | Monogalactosyldiacylglycerol | 729940.62   | C43H74O10  | [M+NH4] <sup>+</sup> | 768.56 | 750.53 | 0.22 |
| 5778 | NA            | NA                           | 323149.19   | NA         | NA                   | 768.56 | NA     | NA   |
| 5795 | MGDG 34:6 (1) | Monogalactosyldiacylglycerol | 305295.29   | C43H70O10  | [M+Na] <sup>+</sup>  | 769.49 | 746.50 | 0.03 |
| 5815 | NA            | NA                           | 276682.47   | NA         | NA                   | 770.57 | NA     | NA   |
| 5816 | MGDG 34:3 (1) | Monogalactosyldiacylglycerol | 11218530.68 | C43H76O10  | [M+NH4] <sup>+</sup> | 770.58 | 752.54 | 1.16 |
| 5822 | NA            | NA                           | 3086930.35  | NA         | NA                   | 770.61 | NA     | NA   |
| 5829 | MGDG 34:5 (1) | Monogalactosyldiacylglycerol | 236704.59   | C43H72O10  | [M+Na] <sup>+</sup>  | 771.50 | 748.51 | 0.95 |
| 5852 | NA            | NA                           | 204149.21   | NA         | NA                   | 772.60 | NA     | NA   |
| 5855 | PE 38:2 (1)   | Phosphatidylethanolamine     | 253080.98   | C43H82NO8P | [M+H] <sup>+</sup>   | 772.59 | 771.58 | 0.55 |
| 5857 | MGDG 34:2 (1) | Monogalactosyldiacylglycerol | 2882685.49  | C43H78O10  | [M+NH4] <sup>+</sup> | 772.59 | 754.56 | 0.55 |
| 5876 | NA            | NA                           | 389610.50   | NA         | NA                   | 773.52 | NA     | NA   |
| 5892 | PE 38:1 (1)   | Phosphatidylethanolamine     | 16242.51    | C43H84NO8P | [M+H] <sup>+</sup>   | 774.60 | 773.59 | 0.58 |
| 5902 | NA            | NA                           | 294458.29   | NA         | NA                   | 775.54 | NA     | NA   |
| 5903 | NA            | NA                           | 813438.30   | NA         | NA                   | 775.54 | NA     | NA   |
| 5944 | NA            | NA                           | 231795.41   | NA         | NA                   | 778.42 | NA     | NA   |
| 5949 | PC 36:6 (1)   | Phosphatidylcholine          | 33002066.91 | C44H76NO8P | [M+H] <sup>+</sup>   | 778.54 | 777.53 | 0.92 |
| 5950 | NA            | NA                           | 551376.96   | NA         | NA                   | 778.55 | NA     | NA   |
| 5972 | NA            | NA                           | 1022662.28  | NA         | NA                   | 779.55 | NA     | NA   |
| 5974 | MGDG 34:1 (1) | Monogalactosyldiacylglycerol | 302639.96   | C43H80O10  | [M+Na] <sup>+</sup>  | 779.57 | 756.58 | 0.81 |
| 5985 | NA            | NA                           | 188702.25   | NA         | NA                   | 780.42 | NA     | NA   |
| 5986 | PC 36:5 (1)   | Phosphatidylcholine          | 28513343.90 | C44H78NO8P | [M+H] <sup>+</sup>   | 780.55 | 779.55 | 0.38 |
| 5993 | NA            | NA                           | 184047.09   | NA         | NA                   | 780.70 | NA     | NA   |
| 5994 | NA            | NA                           | 390726.13   | NA         | NA                   | 780.64 | NA     | NA   |
| 6004 | NA            | NA                           | 212773.47   | NA         | NA                   | 781.56 | NA     | NA   |
| 6018 | PG 36:7       | Phosphatidylglycerol         | 171687.38   | C42H69O10P | NA                   | 782.50 | 764.46 | 0.44 |
| 6024 | PC 36:4 (1)   | Phosphatidylcholine          | 18691498.65 | C44H80NO8P | [M+H] <sup>+</sup>   | 782.57 | 781.56 | 0.20 |

|      |               |                              |            |            |                    |        |        |      |
|------|---------------|------------------------------|------------|------------|--------------------|--------|--------|------|
| 6038 | NA            | NA                           | 692966.68  | NA         | NA                 | 782.64 | NA     | NA   |
| 6039 | NA            | NA                           | 452804.14  | NA         | NA                 | 782.65 | NA     | NA   |
| 6053 | NA            | NA                           | 142286.60  | NA         | NA                 | 784.48 | NA     | NA   |
| 6060 | NA            | NA                           | 927906.69  | NA         | NA                 | 783.50 | NA     | NA   |
| 6067 | NA            | NA                           | 415268.80  | NA         | NA                 | 784.52 | NA     | NA   |
| 6068 | NA            | NA                           | 3243983.73 | NA         | NA                 | 784.56 | NA     | NA   |
| 6071 | NA            | NA                           | 228911.10  | NA         | NA                 | 784.55 | NA     | NA   |
| 6089 | PC 36:3 (1)   | Phosphatidylcholine          | 922807.44  | C44H82NO8P | [M+H] <sup>+</sup> | 784.58 | 783.58 | 0.47 |
| 6090 | PC 36:3 (2)   | Phosphatidylcholine          | 5083790.97 | C44H82NO8P | [M+H] <sup>+</sup> | 784.59 | 783.58 | 0.47 |
| 6093 | NA            | NA                           | 162934.71  | NA         | NA                 | 784.58 | NA     | NA   |
| 6097 | NA            | NA                           | 186361.09  | NA         | NA                 | 784.61 | NA     | NA   |
| 6101 | NA            | NA                           | 154256.51  | NA         | NA                 | 784.66 | NA     | NA   |
| 6102 | NA            | NA                           | 577788.46  | NA         | NA                 | 784.66 | NA     | NA   |
| 6106 | NA            | NA                           | 343396.15  | NA         | NA                 | 784.66 | NA     | NA   |
| 6109 | NA            | NA                           | 258474.28  | NA         | NA                 | 784.66 | NA     | NA   |
| 6144 | NA            | NA                           | 385033.99  | NA         | NA                 | 786.49 | NA     | NA   |
| 6151 | NA            | NA                           | 778375.21  | NA         | NA                 | 786.57 | NA     | NA   |
| 6158 | PC 36:2 (1)   | Phosphatidylcholine          | 3515651.59 | C44H84NO8P | [M+H] <sup>+</sup> | 786.60 | 785.59 | 0.11 |
| 6180 | NA            | NA                           | 615117.60  | NA         | NA                 | 787.60 | NA     | NA   |
| 6196 | NA            | NA                           | 1515510.31 | NA         | NA                 | 788.54 | NA     | NA   |
| 6204 | NA            | NA                           | 514655.25  | NA         | NA                 | 788.63 | NA     | NA   |
| 6206 | PC 36:1 (1)   | Phosphatidylcholine          | 194243.53  | C44H86NO8P | [M+H] <sup>+</sup> | 788.62 | 787.61 | 1.80 |
| 6226 | NA            | NA                           | 475027.52  | NA         | NA                 | 789.50 | NA     | NA   |
| 6234 | NA            | NA                           | 242859.55  | NA         | NA                 | 790.54 | NA     | NA   |
| 6235 | MGDG 36:7 (2) | Monogalactosyldiacylglycerol | 582226.33  | C45H72O10  | NA                 | 790.55 | 772.51 | 0.63 |
| 6243 | NA            | NA                           | 316634.93  | NA         | NA                 | 789.55 | NA     | NA   |
| 6262 | NA            | NA                           | 207978.39  | NA         | NA                 | 791.55 | NA     | NA   |
| 6265 | NA            | NA                           | 301723.17  | NA         | NA                 | 791.51 | NA     | NA   |
| 6279 | NA            | NA                           | 311139.15  | NA         | NA                 | 792.56 | NA     | NA   |

|      |               |                              |              |            |                      |        |        |      |
|------|---------------|------------------------------|--------------|------------|----------------------|--------|--------|------|
| 6281 | NA            | NA                           | 1064938.55   | NA         | NA                   | 792.42 | NA     | NA   |
| 6282 | MGDG 36:6 (1) | Monogalactosyldiacylglycerol | 162157922.70 | C45H74O10  | [M+NH4] <sup>+</sup> | 792.56 | 774.53 | 0.94 |
| 6283 | NA            | NA                           | 1052009.91   | NA         | NA                   | 792.70 | NA     | NA   |
| 6289 | NA            | NA                           | 1638755.09   | NA         | NA                   | 792.60 | NA     | NA   |
| 6304 | NA            | NA                           | 266723.74    | NA         | NA                   | 793.52 | NA     | NA   |
| 6317 | NA            | NA                           | 166935.23    | NA         | NA                   | 794.31 | NA     | NA   |
| 6318 | NA            | NA                           | 215650.83    | NA         | NA                   | 794.49 | NA     | NA   |
| 6319 | NA            | NA                           | 192589.61    | NA         | NA                   | 794.50 | NA     | NA   |
| 6320 | NA            | NA                           | 170334.39    | NA         | NA                   | 794.54 | NA     | NA   |
| 6323 | MGDG 36:5 (1) | Monogalactosyldiacylglycerol | 10707568.44  | C45H76O10  | [M+NH4] <sup>+</sup> | 794.58 | 776.54 | 1.28 |
| 6348 | NA            | NA                           | 153253.99    | NA         | NA                   | 795.50 | NA     | NA   |
| 6351 | NA            | NA                           | 579537.15    | NA         | NA                   | 795.50 | NA     | NA   |
| 6352 | NA            | NA                           | 379932.89    | NA         | NA                   | 795.53 | NA     | NA   |
| 6373 | MGDG 36:4 (1) | Monogalactosyldiacylglycerol | 4004948.74   | C45H78O10  | [M+NH4] <sup>+</sup> | 796.59 | 778.56 | 0.23 |
| 6399 | MGDG 36:6 (2) | Monogalactosyldiacylglycerol | 264664.11    | C45H74O10  | [M+Na] <sup>+</sup>  | 797.52 | 774.53 | 0.27 |
| 6413 | NA            | NA                           | 207094.97    | NA         | NA                   | 798.61 | NA     | NA   |
| 6424 | MGDG 36:3 (2) | Monogalactosyldiacylglycerol | 2101669.99   | C45H80O10  | [M+NH4] <sup>+</sup> | 798.61 | 780.58 | 0.57 |
| 6432 | NA            | NA                           | 1258326.81   | NA         | NA                   | 798.65 | NA     | NA   |
| 6453 | MGDG 36:5 (2) | Monogalactosyldiacylglycerol | 623516.52    | C45H76O10  | [M+Na] <sup>+</sup>  | 799.53 | 776.54 | 1.46 |
| 6485 | MGDG 36:2 (1) | Monogalactosyldiacylglycerol | 243230.57    | C45H82O10  | [M+NH4] <sup>+</sup> | 800.62 | 782.59 | 4.79 |
| 6501 | NA            | NA                           | 3997256.16   | NA         | NA                   | 801.54 | NA     | NA   |
| 6530 | NA            | NA                           | 574111.16    | NA         | NA                   | 803.55 | NA     | NA   |
| 6536 | MGDG 36:3 (1) | Monogalactosyldiacylglycerol | 210407.72    | C45H80O10  | [M+Na] <sup>+</sup>  | 803.56 | 780.58 | 0.25 |
| 6538 | NA            | NA                           | 1901288.86   | NA         | NA                   | 803.56 | NA     | NA   |
| 6558 | NA            | NA                           | 271792.52    | NA         | NA                   | 804.54 | NA     | NA   |
| 6585 | NA            | NA                           | 179781.94    | NA         | NA                   | 805.58 | NA     | NA   |
| 6600 | NA            | NA                           | 335653.45    | NA         | NA                   | 806.54 | NA     | NA   |
| 6604 | NA            | NA                           | 1128741.99   | NA         | NA                   | 806.54 | NA     | NA   |
| 6610 | PC 38:6 (1)   | Phosphatidylcholine          | 617677.07    | C46H80NO8P | [M+H] <sup>+</sup>   | 806.57 | 805.56 | 0.56 |

|      |               |                              |            |            |         |        |        |      |
|------|---------------|------------------------------|------------|------------|---------|--------|--------|------|
| 6638 | MGDG 36:1 (1) | Monogalactosyldiacylglycerol | 30186.08   | C45H84O10  | [M+Na]+ | 807.59 | 784.61 | 2.46 |
| 6649 | NA            | NA                           | 634326.58  | NA         | NA      | 808.56 | NA     | NA   |
| 6653 | NA            | NA                           | 571859.35  | NA         | NA      | 808.56 | NA     | NA   |
| 6659 | PC 38:5 (1)   | Phosphatidylcholine          | 398994.35  | C46H82NO8P | [M+H]+  | 808.59 | 807.58 | 0.15 |
| 6661 | NA            | NA                           | 181077.34  | NA         | NA      | 808.58 | NA     | NA   |
| 6666 | NA            | NA                           | 161170.62  | NA         | NA      | 808.67 | NA     | NA   |
| 6680 | NA            | NA                           | 649460.04  | NA         | NA      | 809.59 | NA     | NA   |
| 6692 | NA            | NA                           | 449321.00  | NA         | NA      | 810.58 | NA     | NA   |
| 6697 | PC 38:4 (1)   | Phosphatidylcholine          | 212418.75  | C46H84NO8P | [M+H]+  | 810.60 | 809.59 | 3.34 |
| 6699 | NA            | NA                           | 335695.50  | NA         | NA      | 810.61 | NA     | NA   |
| 6716 | NA            | NA                           | 413583.54  | NA         | NA      | 811.49 | NA     | NA   |
| 6719 | NA            | NA                           | 765048.93  | NA         | NA      | 811.50 | NA     | NA   |
| 6731 | NA            | NA                           | 2395237.65 | NA         | NA      | 811.60 | NA     | NA   |
| 6749 | NA            | NA                           | 283091.30  | NA         | NA      | 812.59 | NA     | NA   |
| 6750 | NA            | NA                           | 7263479.83 | NA         | NA      | 812.55 | NA     | NA   |
| 6755 | PC 38:3 (1)   | Phosphatidylcholine          | 89706.87   | C46H86NO8P | [M+H]+  | 812.62 | 811.61 | 1.07 |
| 6756 | PC 38:3 (2)   | Phosphatidylcholine          | 236496.43  | C46H86NO8P | [M+H]+  | 812.62 | 811.61 | 1.44 |
| 6769 | NA            | NA                           | 420748.62  | NA         | NA      | 812.66 | NA     | NA   |
| 6776 | NA            | NA                           | 1195051.38 | NA         | NA      | 813.51 | NA     | NA   |
| 6778 | NA            | NA                           | 463863.99  | NA         | NA      | 813.51 | NA     | NA   |
| 6779 | NA            | NA                           | 232434.62  | NA         | NA      | 813.51 | NA     | NA   |
| 6788 | NA            | NA                           | 751161.60  | NA         | NA      | 813.62 | NA     | NA   |
| 6798 | NA            | NA                           | 245723.37  | NA         | NA      | 814.52 | NA     | NA   |
| 6801 | NA            | NA                           | 3553968.83 | NA         | NA      | 814.61 | NA     | NA   |
| 6807 | NA            | NA                           | 206889.00  | NA         | NA      | 814.60 | NA     | NA   |
| 6810 | PC 38:2 (2)   | Phosphatidylcholine          | 165254.41  | C46H88NO8P | [M+H]+  | 814.63 | 813.62 | 0.58 |
| 6822 | NA            | NA                           | 251785.01  | NA         | NA      | 815.51 | NA     | NA   |
| 6853 | NA            | NA                           | 2233776.68 | NA         | NA      | 816.62 | NA     | NA   |
| 6857 | NA            | NA                           | 1144095.57 | NA         | NA      | 816.66 | NA     | NA   |

|      |               |                               |            |            |                      |        |        |      |
|------|---------------|-------------------------------|------------|------------|----------------------|--------|--------|------|
| 6859 | PC 38:1 (2)   | Phosphatidylcholine           | 10308.90   | C46H90NO8P | [M+H] <sup>+</sup>   | 816.65 | 815.64 | 0.85 |
| 6860 | TAG 48:4 (1)  | Triacylglyceride              | 10235.56   | C51H90O6   | [M+NH4] <sup>+</sup> | 816.71 | 798.67 | 2.26 |
| 6867 | NA            | NA                            | 370231.13  | NA         | NA                   | 817.51 | NA     | NA   |
| 6872 | NA            | NA                            | 250096.57  | NA         | NA                   | 817.52 | NA     | NA   |
| 6895 | TAG 48:3 (1)  | Triacylglyceride              | 64876.22   | C51H92O6   | [M+NH4] <sup>+</sup> | 818.72 | 800.69 | 1.55 |
| 6903 | NA            | NA                            | 221066.86  | NA         | NA                   | 819.54 | NA     | NA   |
| 6924 | NA            | NA                            | 629906.12  | NA         | NA                   | 820.59 | NA     | NA   |
| 6935 | NA            | NA                            | 1109133.80 | NA         | NA                   | 820.63 | NA     | NA   |
| 6940 | NA            | NA                            | 223833.66  | NA         | NA                   | 820.75 | NA     | NA   |
| 6971 | NA            | NA                            | 270219.04  | NA         | NA                   | 822.61 | NA     | NA   |
| 6984 | TAG 48:1 (1)  | Triacylglyceride              | 37394.72   | C51H96O6   | [M+NH4] <sup>+</sup> | 822.75 | 804.72 | 1.34 |
| 7015 | NA            | NA                            | 1174780.40 | NA         | NA                   | 824.55 | NA     | NA   |
| 7023 | NA            | NA                            | 242492.48  | NA         | NA                   | 824.63 | NA     | NA   |
| 7035 | TAG 48:0 (1)  | Triacylglyceride              | 25573.57   | C51H98O6   | [M+NH4] <sup>+</sup> | 824.77 | 806.74 | 1.97 |
| 7043 | MGDG 38:6 (1) | Monogalactosyldiacylglycerol  | 1177701.91 | C47H78O10  | [M+Na] <sup>+</sup>  | 825.55 | 802.56 | 0.20 |
| 7058 | NA            | NA                            | 230826.80  | NA         | NA                   | 826.52 | NA     | NA   |
| 7064 | NA            | NA                            | 238995.35  | NA         | NA                   | 826.60 | NA     | NA   |
| 7080 | NA            | NA                            | 543283.20  | NA         | NA                   | 826.68 | NA     | NA   |
| 7096 | MGDG 38:5 (1) | Monogalactosyldiacylglycerol  | 233752.14  | C47H80O10  | [M+Na] <sup>+</sup>  | 827.56 | 804.58 | 4.70 |
| 7108 | NA            | NA                            | 355063.12  | NA         | NA                   | 828.53 | NA     | NA   |
| 7119 | NA            | NA                            | 275287.60  | NA         | NA                   | 828.67 | NA     | NA   |
| 7134 | NA            | NA                            | 182096.81  | NA         | NA                   | 829.51 | NA     | NA   |
| 7136 | NA            | NA                            | 913959.52  | NA         | NA                   | 829.51 | NA     | NA   |
| 7163 | NA            | NA                            | 300249.97  | NA         | NA                   | 830.67 | NA     | NA   |
| 7171 | NA            | NA                            | 480560.34  | NA         | NA                   | 830.78 | NA     | NA   |
| 7180 | NA            | NA                            | 240424.01  | NA         | NA                   | 831.57 | NA     | NA   |
| 7181 | NA            | NA                            | 366822.75  | NA         | NA                   | 831.57 | NA     | NA   |
| 7198 | SQDG 34:4     | Sulfoquinovosyldiacylglycerol | 161679.82  | C43H74O12S | NA                   | 832.53 | 814.49 | 1.54 |
| 7216 | NA            | NA                            | 4421469.24 | NA         | NA                   | 833.59 | NA     | NA   |

|      |               |                               |             |                     |        |        |      |
|------|---------------|-------------------------------|-------------|---------------------|--------|--------|------|
| 7239 | SQDG 34:3 (1) | Sulfoquinovosyldiacylglycerol | 16766371.60 | C43H76O12S [M+NH4]+ | 834.54 | 816.51 | 0.91 |
| 7261 | NA            | NA                            | 2222835.77  | NA NA               | 835.60 | NA     | NA   |
| 7289 | NA            | NA                            | 1952276.09  | NA NA               | 836.59 | NA     | NA   |
| 7290 | SQDG 34:2 (1) | Sulfoquinovosyldiacylglycerol | 1809383.45  | C43H78O12S [M+NH4]+ | 836.56 | 818.52 | 0.28 |
| 7314 | NA            | NA                            | 1582623.04  | NA NA               | 837.62 | NA     | NA   |
| 7332 | NA            | NA                            | 1014203.02  | NA NA               | 838.61 | NA     | NA   |
| 7338 | NA            | NA                            | 396119.60   | NA NA               | 838.64 | NA     | NA   |
| 7353 | NA            | NA                            | 752618.80   | NA NA               | 839.63 | NA     | NA   |
| 7355 | NA            | NA                            | 140843.75   | NA NA               | 839.63 | NA     | NA   |
| 7380 | NA            | NA                            | 1579263.15  | NA NA               | 840.62 | NA     | NA   |
| 7382 | NA            | NA                            | 219812.59   | NA NA               | 840.59 | NA     | NA   |
| 7394 | TAG 50:6 (1)  | Triacylglyceride              | 72185.33    | C53H90O6 [M+NH4]+   | 840.71 | 822.67 | 3.57 |
| 7402 | NA            | NA                            | 167911.61   | NA NA               | 841.52 | NA     | NA   |
| 7411 | NA            | NA                            | 186343.97   | NA NA               | 841.68 | NA     | NA   |
| 7429 | NA            | NA                            | 581382.32   | NA NA               | 842.64 | NA     | NA   |
| 7440 | TAG 50:5 (1)  | Triacylglyceride              | 85280.65    | C53H92O6 [M+NH4]+   | 842.72 | 824.69 | 1.43 |
| 7459 | NA            | NA                            | 312099.94   | NA NA               | 844.65 | NA     | NA   |
| 7462 | NA            | NA                            | 3941607.25  | NA NA               | 844.69 | NA     | NA   |
| 7465 | TAG 50:4 (1)  | Triacylglyceride              | 82388.46    | C53H94O6 [M+NH4]+   | 844.74 | 826.71 | 1.40 |
| 7503 | NA            | NA                            | 489709.05   | NA NA               | 846.77 | NA     | NA   |
| 7504 | TAG 50:3 (1)  | Triacylglyceride              | 4904442.40  | C53H96O6 [M+NH4]+   | 846.76 | 828.72 | 0.86 |
| 7531 | NA            | NA                            | 287233.74   | NA NA               | 848.55 | NA     | NA   |
| 7548 | NA            | NA                            | 550171.65   | NA NA               | 848.66 | NA     | NA   |
| 7558 | TAG 50:2 (1)  | Triacylglyceride              | 2293785.08  | C53H98O6 [M+NH4]+   | 848.77 | 830.74 | 2.13 |
| 7562 | NA            | NA                            | 175681.65   | NA NA               | 849.58 | NA     | NA   |
| 7573 | NA            | NA                            | 693498.95   | NA NA               | 850.55 | NA     | NA   |
| 7574 | NA            | NA                            | 386204.36   | NA NA               | 850.60 | NA     | NA   |
| 7603 | TAG 50:1 (1)  | Triacylglyceride              | 500599.26   | C53H100O6 [M+NH4]+  | 850.79 | 832.75 | 1.23 |
| 7613 | NA            | NA                            | 258241.69   | NA NA               | 851.73 | NA     | NA   |



|      |               |                               |             |                     |        |        |      |
|------|---------------|-------------------------------|-------------|---------------------|--------|--------|------|
| 7618 | PI 34:2 (1)   | Phosphatidylinositol          | 426336.76   | C43H79O13P [M+NH4]+ | 852.56 | 834.53 | 0.26 |
| 7622 | NA            | NA                            | 249880.75   | NA NA               | 852.65 | NA     | NA   |
| 7627 | TAG 50:0 (1)  | Triacylglyceride              | 16868.31    | C53H102O6 [M+NH4]+  | 852.80 | 834.77 | 2.20 |
| 7693 | SQDG 36:6 (1) | Sulfoquinovosyldiacylglycerol | 14352426.23 | C45H74O12S [M+NH4]+ | 856.52 | 838.49 | 0.22 |
| 7733 | SQDG 36:5 (1) | Sulfoquinovosyldiacylglycerol | 3651565.29  | C45H76O12S [M+NH4]+ | 858.54 | 840.51 | 0.54 |
| 7739 | NA            | NA                            | 218226.05   | NA NA               | 858.70 | NA     | NA   |
| 7742 | NA            | NA                            | 260417.56   | NA NA               | 858.81 | NA     | NA   |
| 7767 | SQDG 36:4 (1) | Sulfoquinovosyldiacylglycerol | 479927.43   | C45H78O12S [M+NH4]+ | 860.56 | 842.52 | 0.79 |
| 7769 | NA            | NA                            | 183282.82   | NA NA               | 860.54 | NA     | NA   |
| 7791 | NA            | NA                            | 206220.21   | NA NA               | 861.62 | NA     | NA   |
| 7809 | SQDG 36:3 (1) | Sulfoquinovosyldiacylglycerol | 1141501.96  | C45H80O12S [M+NH4]+ | 862.57 | 844.54 | 0.58 |
| 7829 | NA            | NA                            | 400355.14   | NA NA               | 863.50 | NA     | NA   |
| 7862 | NA            | NA                            | 469051.54   | NA NA               | 864.63 | NA     | NA   |
| 7870 | SQDG 38:7 (1) | Sulfoquinovosyldiacylglycerol | 96686.24    | C47H76O12S [M+H]+   | 865.51 | 864.51 | 0.25 |
| 7895 | NA            | NA                            | 1780252.43  | NA NA               | 866.67 | NA     | NA   |
| 7896 | TAG 52:7 (1)  | Triacylglyceride              | 61928.37    | C55H92O6 [M+NH4]+   | 866.72 | 848.69 | 1.82 |
| 7900 | SQDG 38:6 (1) | Sulfoquinovosyldiacylglycerol | 9787.18     | C47H78O12S [M+H]+   | 867.53 | 866.52 | 2.45 |
| 7914 | NA            | NA                            | 172643.55   | NA NA               | 867.68 | NA     | NA   |
| 7927 | NA            | NA                            | 164426.78   | NA NA               | 868.68 | NA     | NA   |
| 7930 | TAG 52:6 (1)  | Triacylglyceride              | 10503836.94 | C55H94O6 [M+NH4]+   | 868.74 | 850.71 | 0.03 |
| 7965 | NA            | NA                            | 222927.33   | NA NA               | 870.70 | NA     | NA   |
| 7969 | TAG 52:5 (1)  | Triacylglyceride              | 10713794.06 | C55H96O6 [M+NH4]+   | 870.75 | 852.72 | 0.07 |
| 7988 | NA            | NA                            | 154255.22   | NA NA               | 871.42 | NA     | NA   |
| 7989 | NA            | NA                            | 23356024.97 | NA NA               | 871.57 | NA     | NA   |
| 7990 | NA            | NA                            | 164574.49   | NA NA               | 871.73 | NA     | NA   |
| 8010 | NA            | NA                            | 584553.18   | NA NA               | 872.72 | NA     | NA   |
| 8017 | TAG 52:4 (1)  | Triacylglyceride              | 5137275.07  | C55H98O6 [M+NH4]+   | 872.77 | 854.74 | 0.11 |
| 8045 | PI 36:5 (1)   | Phosphatidylinositol          | 106414.89   | C45H77O13P [M+NH4]+ | 874.54 | 856.51 | 0.56 |
| 8057 | NA            | NA                            | 664899.44   | NA NA               | 874.79 | NA     | NA   |

|      |              |                              |             |                     |        |        |      |
|------|--------------|------------------------------|-------------|---------------------|--------|--------|------|
| 8059 | TAG 52:3 (1) | Triacylglyceride             | 2326654.07  | C55H100O6 [M+NH4]+  | 874.79 | 856.75 | 0.85 |
| 8080 | NA           | NA                           | 223981.10   | NA NA               | 875.80 | NA     | NA   |
| 8084 | PI 36:4 (1)  | Phosphatidylinositol         | 41358.17    | C45H79O13P [M+NH4]+ | 876.56 | 858.53 | 1.49 |
| 8091 | TAG 52:2 (1) | Triacylglyceride             | 1022931.41  | C55H102O6 [M+NH4]+  | 876.80 | 858.77 | 1.44 |
| 8117 | TAG 52:1 (1) | Triacylglyceride             | 94926.61    | C55H104O6 [M+NH4]+  | 878.82 | 860.78 | 1.90 |
| 8140 | NA           | NA                           | 158265.19   | NA NA               | 880.69 | NA     | NA   |
| 8146 | TAG 52:0 (1) | Triacylglyceride             | 15276.82    | C55H106O6 [M+NH4]+  | 880.83 | 862.80 | 2.01 |
| 8188 | NA           | NA                           | 166900.47   | NA NA               | 884.56 | NA     | NA   |
| 8212 | NA           | NA                           | 809380.22   | NA NA               | 885.55 | NA     | NA   |
| 8227 | NA           | NA                           | 177784.82   | NA NA               | 886.62 | NA     | NA   |
| 8254 | NA           | NA                           | 316985.35   | NA NA               | 887.80 | NA     | NA   |
| 8280 | MGDG 42:2    | Monogalactosyldiacylglycerol | 168433.68   | C51H94O10           | 889.67 | 866.68 | 0.99 |
| 8284 | NA           | NA                           | 368592.10   | NA NA               | 889.67 | NA     | NA   |
| 8298 | TAG 54:9 (1) | Triacylglyceride             | 4221541.10  | C57H92O6 [M+NH4]+   | 890.72 | 872.69 | 0.74 |
| 8315 | NA           | NA                           | 181959.39   | NA NA               | 891.53 | NA     | NA   |
| 8327 | NA           | NA                           | 312089.81   | NA NA               | 891.68 | NA     | NA   |
| 8342 | NA           | NA                           | 4271824.79  | NA NA               | 892.53 | NA     | NA   |
| 8345 | NA           | NA                           | 186825.72   | NA NA               | 893.26 | NA     | NA   |
| 8346 | NA           | NA                           | 236834.30   | NA NA               | 893.40 | NA     | NA   |
| 8347 | NA           | NA                           | 33606428.95 | NA NA               | 893.54 | NA     | NA   |
| 8355 | NA           | NA                           | 1164973.45  | NA NA               | 893.54 | NA     | NA   |
| 8356 | NA           | NA                           | 1079709.46  | NA NA               | 893.55 | NA     | NA   |
| 8363 | TAG 54:8 (1) | Triacylglyceride             | 7565873.06  | C57H94O6 [M+NH4]+   | 892.74 | 874.71 | 0.23 |
| 8373 | NA           | NA                           | 171686.11   | NA NA               | 892.83 | NA     | NA   |
| 8377 | NA           | NA                           | 191446.28   | NA NA               | 894.39 | NA     | NA   |
| 8379 | NA           | NA                           | 426788.56   | NA NA               | 894.70 | NA     | NA   |
| 8383 | TAG 54:7 (1) | Triacylglyceride             | 6383190.54  | C57H96O6 [M+NH4]+   | 894.75 | 876.72 | 0.14 |
| 8412 | TAG 54:6 (1) | Triacylglyceride             | 4109897.11  | C57H98O6 [M+NH4]+   | 896.77 | 878.74 | 0.18 |
| 8432 | TAG 54:5 (1) | Triacylglyceride             | 2628237.04  | C57H100O6 [M+NH4]+  | 898.79 | 880.75 | 0.08 |

|      |               |                             |            |                    |        |        |      |
|------|---------------|-----------------------------|------------|--------------------|--------|--------|------|
| 8460 | TAG 54:4 (1)  | Triacylglyceride            | 985250.85  | C57H102O6 [M+NH4]+ | 900.80 | 882.77 | 0.66 |
| 8492 | NA            | NA                          | 246657.91  | NA NA              | 902.74 | NA     | NA   |
| 8495 | NA            | NA                          | 150563.97  | NA NA              | 902.83 | NA     | NA   |
| 8496 | TAG 54:3 (1)  | Triacylglyceride            | 655478.46  | C57H104O6 [M+NH4]+ | 902.82 | 884.78 | 1.04 |
| 8527 | TAG 54:2 (1)  | Triacylglyceride            | 189255.64  | C57H106O6 [M+NH4]+ | 904.83 | 886.80 | 1.48 |
| 8554 | NA            | NA                          | 391607.45  | NA NA              | 906.51 | NA     | NA   |
| 8565 | TAG 54:1 (1)  | Triacylglyceride            | 20910.64   | C57H108O6 [M+NH4]+ | 906.85 | 888.81 | 2.19 |
| 8576 | NA            | NA                          | 9469424.83 | NA NA              | 907.52 | NA     | NA   |
| 8579 | NA            | NA                          | 285450.90  | NA NA              | 907.52 | NA     | NA   |
| 8580 | NA            | NA                          | 307077.49  | NA NA              | 907.53 | NA     | NA   |
| 8613 | TAG 54:0 (1)  | Triacylglyceride            | 11942.44   | C57H110O6 [M+NH4]+ | 908.87 | 890.83 | 2.29 |
| 8628 | NA            | NA                          | 748450.83  | NA NA              | 909.76 | NA     | NA   |
| 8637 | DGDG 32:0 (1) | Digalactosyl-Diacylglycerol | 1490259.75 | C47H88O15 [M+NH4]+ | 910.65 | 892.61 | 1.10 |
| 8654 | NA            | NA                          | 339690.06  | NA NA              | 911.65 | NA     | NA   |
| 8657 | NA            | NA                          | 561452.57  | NA NA              | 911.78 | NA     | NA   |
| 8678 | NA            | NA                          | 372766.27  | NA NA              | 913.67 | NA     | NA   |
| 8680 | NA            | NA                          | 169034.14  | NA NA              | 913.80 | NA     | NA   |
| 8694 | DGDG 32:0     | Digalactosyl-Diacylglycerol | 1828274.95 | C47H88O15          | 915.60 | 892.61 | 0.42 |
| 8695 | NA            | NA                          | 848423.51  | NA NA              | 915.52 | NA     | NA   |
| 8696 | NA            | NA                          | 236709.18  | NA NA              | 915.52 | NA     | NA   |
| 8702 | NA            | NA                          | 254024.98  | NA NA              | 915.68 | NA     | NA   |
| 8704 | NA            | NA                          | 168742.03  | NA NA              | 915.83 | NA     | NA   |
| 8737 | NA            | NA                          | 195981.51  | NA NA              | 918.74 | NA     | NA   |
| 8738 | TAG 56:9 (1)  | Triacylglyceride            | 84743.26   | C59H96O6 [M+NH4]+  | 918.76 | 900.72 | 0.73 |
| 8763 | NA            | NA                          | 249533.19  | NA NA              | 920.77 | NA     | NA   |
| 8764 | TAG 56:8 (1)  | Triacylglyceride            | 212555.62  | C59H98O6 [M+NH4]+  | 920.77 | 902.74 | 1.36 |
| 8765 | NA            | NA                          | 208314.70  | NA NA              | 920.86 | NA     | NA   |
| 8791 | NA            | NA                          | 215594.65  | NA NA              | 922.69 | NA     | NA   |
| 8793 | NA            | NA                          | 162985.81  | NA NA              | 922.79 | NA     | NA   |

|      |               |                             |             |                    |        |        |      |
|------|---------------|-----------------------------|-------------|--------------------|--------|--------|------|
| 8794 | TAG 56:7 (1)  | Triacylglyceride            | 248351.03   | C59H100O6 [M+NH4]+ | 922.79 | 904.75 | 1.47 |
| 8827 | TAG 56:6 (1)  | Triacylglyceride            | 552501.04   | C59H102O6 [M+NH4]+ | 924.80 | 906.77 | 0.91 |
| 8829 | NA            | NA                          | 185734.39   | NA NA              | 925.53 | NA     | NA   |
| 8858 | TAG 56:5 (1)  | Triacylglyceride            | 438640.31   | C59H104O6 [M+NH4]+ | 926.82 | 908.78 | 1.60 |
| 8877 | TAG 56:4 (1)  | Triacylglyceride            | 146392.08   | C59H106O6 [M+NH4]+ | 928.83 | 910.80 | 1.24 |
| 8883 | NA            | NA                          | 519267.24   | NA NA              | 929.50 | NA     | NA   |
| 8901 | NA            | NA                          | 837078.57   | NA NA              | 930.61 | NA     | NA   |
| 8913 | TAG 56:3 (1)  | Triacylglyceride            | 144136.32   | C59H108O6 [M+NH4]+ | 930.85 | 912.81 | 1.41 |
| 8935 | NA            | NA                          | 902950.92   | NA NA              | 931.75 | NA     | NA   |
| 8946 | NA            | NA                          | 178377.59   | NA NA              | 932.47 | NA     | NA   |
| 8947 | DGDG 34:3 (1) | Digalactosyl-Diacylglycerol | 29815813.61 | C49H86O15 [M+NH4]+ | 932.63 | 914.60 | 0.73 |
| 8957 | NA            | NA                          | 176484.78   | NA NA              | 932.82 | NA     | NA   |
| 8961 | TAG 56:2 (1)  | Triacylglyceride            | 59549.01    | C59H110O6 [M+NH4]+ | 932.87 | 914.83 | 2.30 |
| 8976 | NA            | NA                          | 1186240.52  | NA NA              | 933.77 | NA     | NA   |
| 8988 | DGDG 34:2 (1) | Digalactosyl-Diacylglycerol | 8555475.72  | C49H88O15 [M+NH4]+ | 934.65 | 916.61 | 0.17 |
| 8997 | TAG 56:1 (1)  | Triacylglyceride            | 8175.63     | C59H112O6 [M+NH4]+ | 934.88 | 916.85 | 1.61 |
| 9002 | DGDG 34:4 (1) | Digalactosyl-Diacylglycerol | 479561.97   | C49H84O15 [M+Na]+  | 935.57 | 912.58 | 1.24 |
| 9004 | DGDG 34:4 (2) | Digalactosyl-Diacylglycerol | 412076.90   | C49H86O15 NA       | 935.57 | 912.58 | 0.13 |
| 9005 | NA            | NA                          | 288540.17   | NA NA              | 935.59 | NA     | NA   |
| 9015 | NA            | NA                          | 742175.64   | NA NA              | 935.78 | NA     | NA   |
| 9027 | DGDG 34:1 (1) | Digalactosyl-Diacylglycerol | 746570.33   | C49H90O15 [M+NH4]+ | 936.66 | 918.63 | 0.39 |
| 9043 | NA            | NA                          | 329853.93   | NA NA              | 937.80 | NA     | NA   |
| 9084 | NA            | NA                          | 254258.30   | NA NA              | 940.60 | NA     | NA   |
| 9138 | NA            | NA                          | 192865.72   | NA NA              | 943.61 | NA     | NA   |
| 9159 | NA            | NA                          | 340297.11   | NA NA              | 945.56 | NA     | NA   |
| 9176 | NA            | NA                          | 845010.49   | NA NA              | 946.65 | NA     | NA   |
| 9212 | TAG 58:8 (1)  | Triacylglyceride            | 16083.05    | C61H102O6 [M+NH4]+ | 948.80 | 930.77 | 1.53 |
| 9215 | NA            | NA                          | 159378.08   | NA NA              | 948.90 | NA     | NA   |
| 9220 | NA            | NA                          | 198870.35   | NA NA              | 949.61 | NA     | NA   |

|      |               |                             |             |                    |    |        |        |      |
|------|---------------|-----------------------------|-------------|--------------------|----|--------|--------|------|
| 9245 | NA            | NA                          | 316471.33   | NA                 | NA | 950.83 | NA     | NA   |
| 9256 | NA            | NA                          | 1137986.83  | NA                 | NA | 951.60 | NA     | NA   |
| 9260 | NA            | NA                          | 673818.17   | NA                 | NA | 951.59 | NA     | NA   |
| 9261 | NA            | NA                          | 208876.83   | NA                 | NA | 951.60 | NA     | NA   |
| 9278 | TAG 58:6 (1)  | Triacylglyceride            | 222566.04   | C61H106O6 [M+NH4]+ |    | 952.83 | 934.80 | 2.17 |
| 9280 | NA            | NA                          | 291277.55   | NA                 | NA | 953.56 | NA     | NA   |
| 9286 | NA            | NA                          | 600404.92   | NA                 | NA | 954.45 | NA     | NA   |
| 9287 | DGDG 36:6 (1) | Digalactosyl-Diacylglycerol | 86393110.45 | C51H84O15 [M+NH4]+ |    | 954.61 | 936.58 | 1.13 |
| 9296 | TAG 58:5 (1)  | Triacylglyceride            | 167074.69   | C61H108O6 [M+NH4]+ |    | 954.85 | 936.81 | 1.89 |
| 9300 | NA            | NA                          | 342858.96   | NA                 | NA | 955.80 | NA     | NA   |
| 9301 | NA            | NA                          | 253630.66   | NA                 | NA | 955.57 | NA     | NA   |
| 9312 | DGDG 36:5 (1) | Digalactosyl-Diacylglycerol | 4667846.19  | C51H86O15 [M+NH4]+ |    | 956.63 | 938.60 | 0.33 |
| 9314 | DGDG 36:5 (2) | Digalactosyl-Diacylglycerol | 302144.33   | C51H86O15 [M+NH4]+ |    | 956.63 | 938.60 | 0.07 |
| 9319 | TAG 58:4 (1)  | Triacylglyceride            | 48884.16    | C61H110O6 [M+NH4]+ |    | 956.87 | 938.83 | 1.92 |
| 9356 | DGDG 36:4 (1) | Digalactosyl-Diacylglycerol | 3348375.87  | C51H88O15 [M+NH4]+ |    | 958.65 | 940.61 | 0.54 |
| 9383 | TAG 58:3 (1)  | Triacylglyceride            | 100007.41   | C61H112O6 [M+NH4]+ |    | 958.88 | 940.85 | 1.45 |
| 9389 | NA            | NA                          | 236950.05   | NA                 | NA | 960.66 | NA     | NA   |
| 9392 | DGDG 36:3 (2) | Digalactosyl-Diacylglycerol | 8628012.05  | C51H90O15 [M+NH4]+ |    | 960.66 | 942.63 | 0.57 |
| 9397 | TAG 58:2 (1)  | Triacylglyceride            | 40790.67    | C61H114O6 [M+NH4]+ |    | 960.90 | 942.86 | 2.31 |
| 9467 | NA            | NA                          | 985000.21   | NA                 | NA | 964.81 | NA     | NA   |
| 9474 | NA            | NA                          | 266081.47   | NA                 | NA | 965.55 | NA     | NA   |
| 9475 | NA            | NA                          | 4509331.81  | NA                 | NA | 965.62 | NA     | NA   |
| 9497 | NA            | NA                          | 184704.15   | NA                 | NA | 966.83 | NA     | NA   |
| 9500 | NA            | NA                          | 164857.77   | NA                 | NA | 966.83 | NA     | NA   |
| 9514 | DGDG 36:2 (1) | Digalactosyl-Diacylglycerol | 1128717.77  | C51H92O15 [M+Na]+  |    | 967.63 | 944.64 | 0.28 |
| 9546 | NA            | NA                          | 253287.58   | NA                 | NA | 969.77 | NA     | NA   |
| 9550 | NA            | NA                          | 258668.32   | NA                 | NA | 970.61 | NA     | NA   |
| 9588 | NA            | NA                          | 200779.70   | NA                 | NA | 973.55 | NA     | NA   |
| 9593 | NA            | NA                          | 2761037.68  | NA                 | NA | 973.66 | NA     | NA   |

|      |               |                             |            |                    |    |         |        |      |
|------|---------------|-----------------------------|------------|--------------------|----|---------|--------|------|
| 9617 | NA            | NA                          | 485177.07  | NA                 | NA | 975.57  | NA     | NA   |
| 9618 | NA            | NA                          | 155932.54  | NA                 | NA | 975.57  | NA     | NA   |
| 9621 | NA            | NA                          | 254176.29  | NA                 | NA | 975.54  | NA     | NA   |
| 9624 | NA            | NA                          | 499890.27  | NA                 | NA | 975.67  | NA     | NA   |
| 9644 | NA            | NA                          | 195027.58  | NA                 | NA | 977.56  | NA     | NA   |
| 9665 | NA            | NA                          | 257530.20  | NA                 | NA | 978.87  | NA     | NA   |
| 9669 | NA            | NA                          | 167380.28  | NA                 | NA | 979.57  | NA     | NA   |
| 9692 | NA            | NA                          | 158640.59  | NA                 | NA | 980.81  | NA     | NA   |
| 9700 | NA            | NA                          | 277057.20  | NA                 | NA | 981.59  | NA     | NA   |
| 9706 | NA            | NA                          | 428941.13  | NA                 | NA | 982.64  | NA     | NA   |
| 9707 | DGDG 38:6 (1) | Digalactosyl-Diacylglycerol | 1765417.96 | C53H88O15 [M+NH4]+ |    | 982.65  | 964.61 | 0.28 |
| 9713 | TAG 60:5 (1)  | Triacylglyceride            | 158208.86  | C63H112O6 [M+NH4]+ |    | 982.88  | 964.85 | 1.85 |
| 9735 | TAG 60:4 (1)  | Triacylglyceride            | 48667.94   | C63H114O6 [M+NH4]+ |    | 984.90  | 966.86 | 2.06 |
| 9762 | NA            | NA                          | 340026.14  | NA                 | NA | 986.61  | NA     | NA   |
| 9769 | TAG 60:3 (1)  | Triacylglyceride            | 29824.65   | C63H116O6 [M+NH4]+ |    | 986.91  | 968.88 | 2.03 |
| 9795 | TAG 60:2 (1)  | Triacylglyceride            | 12547.56   | C63H118O6 [M+NH4]+ |    | 988.93  | 970.89 | 2.19 |
| 9800 | DGDG 38:5 (1) | Digalactosyl-Diacylglycerol | 235863.69  | C53H90O15 [M+Na]+  |    | 989.62  | 966.63 | 0.42 |
| 9814 | NA            | NA                          | 342572.48  | NA                 | NA | 991.56  | NA     | NA   |
| 9832 | NA            | NA                          | 961634.74  | NA                 | NA | 992.84  | NA     | NA   |
| 9847 | NA            | NA                          | 149911.88  | NA                 | NA | 994.86  | NA     | NA   |
| 9848 | NA            | NA                          | 287812.74  | NA                 | NA | 994.86  | NA     | NA   |
| 9853 | NA            | NA                          | 4944084.46 | NA                 | NA | 995.64  | NA     | NA   |
| 9883 | NA            | NA                          | 189227.88  | NA                 | NA | 997.80  | NA     | NA   |
| 9918 | NA            | NA                          | 682673.50  | NA                 | NA | 1001.69 | NA     | NA   |
| 9959 | NA            | NA                          | 383221.63  | NA                 | NA | 1005.84 | NA     | NA   |
| 9965 | NA            | NA                          | 189801.34  | NA                 | NA | 1006.90 | NA     | NA   |
| 9981 | NA            | NA                          | 202955.09  | NA                 | NA | 1007.85 | NA     | NA   |
| 9989 | NA            | NA                          | 654967.86  | NA                 | NA | 1008.81 | NA     | NA   |
| 9990 | NA            | NA                          | 331277.91  | NA                 | NA | 1008.83 | NA     | NA   |

|       |    |    |           |    |    |         |    |    |
|-------|----|----|-----------|----|----|---------|----|----|
| 10012 | NA | NA | 488401.41 | NA | NA | 1010.83 | NA | NA |
| 10041 | NA | NA | 295989.37 | NA | NA | 1013.76 | NA | NA |
| 10043 | NA | NA | 184844.00 | NA | NA | 1013.79 | NA | NA |
| 10057 | NA | NA | 179077.94 | NA | NA | 1015.79 | NA | NA |
| 10077 | NA | NA | 193422.26 | NA | NA | 1018.74 | NA | NA |
| 10099 | NA | NA | 747266.67 | NA | NA | 1020.88 | NA | NA |
| 10118 | NA | NA | 571912.89 | NA | NA | 1022.79 | NA | NA |
| 10122 | NA | NA | 316948.02 | NA | NA | 1022.89 | NA | NA |
| 10132 | NA | NA | 266544.91 | NA | NA | 1023.70 | NA | NA |
| 10143 | NA | NA | 461407.90 | NA | NA | 1024.80 | NA | NA |
| 10178 | NA | NA | 230608.16 | NA | NA | 1027.74 | NA | NA |
| 10191 | NA | NA | 195550.91 | NA | NA | 1029.76 | NA | NA |
| 10224 | NA | NA | 336436.73 | NA | NA | 1033.87 | NA | NA |
| 10237 | NA | NA | 185886.40 | NA | NA | 1035.89 | NA | NA |
| 10248 | NA | NA | 267842.17 | NA | NA | 1036.87 | NA | NA |

**Supplementary Table S2** Results of the genome-wide association mapping. Shown are summaries of SNP-lipid associations significant with  $FDF \leq 0.025$  using a  $\mathbf{Q}_{10} + \mathbf{K}$  mixed model analysis. MAF, minor allele frequency.

| Lipid ID | Repeatability | Chr. | Position  | SNP                    | MAF  | P-value  | Explained genetic variance (%) |
|----------|---------------|------|-----------|------------------------|------|----------|--------------------------------|
| 2013     | 0.84          | 4    | 174839647 | PZE-104099276          | 0.35 | 6.69E-07 | 10.97                          |
|          |               | 6    | 145670499 | PZE-106088022          | 0.44 | 1.48E-06 | 10.38                          |
| 2024     | 0.80          | 1    | 178967893 | PZE-101138093          | 0.19 | 4.29E-06 | 10.24                          |
|          |               | 3    | 173118447 | PZE-103114880          | 0.13 | 4.78E-07 | 10.24                          |
|          |               | 4    | 123455381 | PZE-104062998          | 0.03 | 4.61E-06 | 10.21                          |
|          |               | 5    | 175460577 | PZA03716.2             | 0.03 | 4.61E-06 | 10.21                          |
|          |               | 6    | 165375581 | SYN4313                | 0.03 | 3.85E-06 | 10.65                          |
| 3576     | 0.91          | 5    | 200055931 | SYN13142               | 0.35 | 5.64E-07 | 11.06                          |
|          |               | 7    | 5105391   | SYN4767                | 0.04 | 2.12E-06 | 8.92                           |
| 3709     | 0.78          | 1    | 90434722  | SYN12907               | 0.05 | 1.64E-06 | 11.91                          |
|          |               | 10   | 42372079  | PUT-163a-76923750-4022 | 0.21 | 1.89E-06 | 14.77                          |
|          |               | 10   | 72379858  | PZE-110037962          | 0.08 | 7.62E-07 | 14.27                          |
| 3897     | 0.83          | 10   | 42122081  | PZE-110025815          | 0.06 | 1.07E-06 | 11.50                          |
|          |               | 10   | 72379858  | PZE-110037962          | 0.08 | 4.13E-06 | 9.68                           |
| 4313     | 0.69          | 3    | 173418377 | PZE-103115114          | 0.07 | 3.43E-07 | 16.49                          |
| 4368     | 0.76          | 3    | 173118447 | PZE-103114880          | 0.13 | 7.47E-09 | 16.48                          |
|          |               | 9    | 145587710 | PZE-109109300          | 0.39 | 2.31E-06 | 11.27                          |
| 5185     | 0.81          | 1    | 90434722  | SYN12907               | 0.05 | 1.66E-06 | 11.65                          |
|          |               | 10   | 42122081  | PZE-110025815          | 0.06 | 5.05E-08 | 17.53                          |
|          |               | 10   | 72379858  | PZE-110037962          | 0.08 | 1.03E-07 | 16.52                          |
| 5325     | 0.81          | 1    | 90434722  | SYN12907               | 0.05 | 2.21E-06 | 11.42                          |
|          |               | 10   | 42122081  | PZE-110025815          | 0.06 | 4.30E-08 | 17.73                          |
|          |               | 10   | 72379858  | PZE-110037962          | 0.08 | 8.08E-08 | 16.83                          |
| 5346     | 0.75          | 1    | 15024790  | PZE-101121459          | 0.03 | 9.47E-07 | 12.00                          |
|          |               | 3    | 143778448 | PZE-103089336          | 0.07 | 4.77E-07 | 12.85                          |
| 5376     | 0.84          | 1    | 90434722  | SYN1290                | 0.05 | 2.42E-06 | 10.43                          |
|          |               | 6    | 112736919 | SYN28807               | 0.07 | 4.26E-06 | 9.81                           |
|          |               | 10   | 41583258  | PZE-110025531          | 0.07 | 1.44E-07 | 12.80                          |
|          |               | 10   | 72379858  | PZE-110037962          | 0.08 | 2.18E-06 | 9.95                           |
| 5447     | 0.90          | 5    | 71861230  | PZE-105068954          | 0.15 | 8.14E-07 | 10.47                          |
|          |               | 6    | 111523070 | SYN20374               | 0.03 | 3.94E-10 | 16.18                          |
| 5462     | 0.90          | 5    | 133758422 | PZE-105093162          | 0.33 | 4.97E-13 | 20.79                          |
| 5486     | 0.89          | 7    | 14505509  | PZE-107017173          | 0.08 | 6.94E-07 | 10.12                          |
| 5513     | 0.90          | 5    | 71861230  | PZE-105068954          | 0.15 | 7.65E-07 | 10.55                          |
|          |               | 6    | 111523070 | SYN20374               | 0.03 | 1.29E-09 | 15.22                          |
| 5523     | 0.87          | 8    | 115491648 | PUT-163a-78087243-4204 | 0.39 | 1.27E-13 | 22.37                          |
| 5645     | 0.84          | 1    | 90434722  | SYN12907               | 0.05 | 5.97E-07 | 11.54                          |
|          |               | 6    | 112736919 | SYN28807               | 0.07 | 6.58E-06 | 9.24                           |
|          |               | 10   | 41583258  | PZE-110025531          | 0.07 | 3.93E-08 | 13.73                          |
|          |               | 10   | 72379858  | PZE-110037962          | 0.08 | 2.25E-06 | 9.78                           |



|      |      |    |           |                        |      |          |       |
|------|------|----|-----------|------------------------|------|----------|-------|
| 5651 | 0.66 | 4  | 245414643 | PZE-104156615          | 0.10 | 6.04E-07 | 19.21 |
| 5755 | 0.69 | 4  | 245414643 | PZE-104156615          | 0.10 | 4.96E-07 | 18.09 |
| 5778 | 0.87 | 1  | 90435505  | SYN12912               | 0.06 | 8.67E-07 | 10.16 |
|      |      | 4  | 85049647  | PZE-104050138          | 0.05 | 2.78E-07 | 11.35 |
|      |      | 5  | 86624186  | PZE-105077684          | 0.03 | 6.83E-07 | 10.60 |
|      |      | 6  | 111523070 | SYN20374               | 0.03 | 3.29E-08 | 12.93 |
|      |      | 8  | 115491765 | PUT-163a-50324981-2175 | 0.37 | 1.44E-07 | 11.97 |
| 5876 | 0.88 | 1  | 90435505  | SYN12912               | 0.06 | 3.00E-07 | 10.91 |
|      |      | 4  | 85049647  | PZE-104050138          | 0.05 | 1.22E-06 | 10.12 |
|      |      | 5  | 86624186  | PZE-105077684          | 0.03 | 4.97E-07 | 10.82 |
|      |      | 6  | 111523070 | SYN20374               | 0.03 | 1.29E-07 | 11.81 |
|      |      | 8  | 115491765 | PUT-163a-50324981-2175 | 0.37 | 6.06E-09 | 14.41 |
| 5974 | 0.87 | 6  | 106334896 | PZE-106055850          | 0.12 | 6.67E-07 | 11.15 |
| 6004 | 0.68 | 10 | 72379858  | PZE-110037962          | 0.08 | 6.33E-07 | 15.43 |
| 6018 | 0.87 | 4  | 33567688  | ZM008854-0420          | 0.02 | 2.21E-07 | 11.44 |
|      |      | 9  | 117591396 | PZE-109075210          | 0.03 | 7.58E-07 | 10.61 |
| 6109 | 0.88 | 5  | 133758422 | PZE-105093162          | 0.33 | 3.32E-11 | 18.27 |
| 6151 | 0.74 | 8  | 17434337  | PZB01977.4             | 0.20 | 1.43E-07 | 13.54 |
| 6204 | 0.82 | 2  | 144485924 | PZE-102112760          | 0.25 | 1.29E-06 | 12.43 |
| 6235 | 0.86 | 4  | 33567688  | ZM008854-0420          | 0.02 | 9.44E-07 | 10.25 |
|      |      | 8  | 115491765 | PUT-163a-50324981-2175 | 0.37 | 1.33E-06 | 10.38 |
|      |      | 10 | 41362464  | SYN12445               | 0.06 | 7.43E-08 | 12.74 |
| 6351 | 0.87 | 4  | 33567688  | ZM008854-0420          | 0.02 | 1.02E-06 | 9.93  |
|      |      | 8  | 115491765 | PUT-163a-50324981-2175 | 0.37 | 3.31E-07 | 11.19 |
|      |      | 10 | 41362464  | SYN12445               | 0.06 | 2.13E-07 | 11.48 |
| 6352 | 0.72 | 4  | 33567688  | ZM008854-0420          | 0.02 | 1.15E-08 | 16.34 |
|      |      | 10 | 41362464  | SYN12445               | 0.06 | 8.90E-09 | 17.49 |
| 6373 | 0.79 | 3  | 173118447 | PZE-103114880          | 0.13 | 1.66E-08 | 14.84 |
| 6530 | 0.81 | 6  | 112736919 | SYN28807               | 0.07 | 6.73E-06 | 9.59  |
|      |      | 10 | 42122081  | PZE-110025815          | 0.06 | 5.66E-08 | 14.22 |
|      |      | 10 | 72379858  | PZE-110037962          | 0.08 | 2.99E-06 | 9.95  |
| 6604 | 0.88 | 8  | 16788619  | PZE-108016906          | 0.50 | 3.88E-07 | 11.00 |
| 6638 | 0.81 | 10 | 82262832  | PZE-110043318          | 0.48 | 1.07E-06 | 11.32 |
| 6653 | 0.88 | 3  | 138478491 | SYN18807               | 0.23 | 1.25E-05 | 8.43  |
|      |      | 4  | 213479432 | PZE-104128161          | 0.04 | 5.27E-06 | 9.66  |
|      |      | 8  | 17706101  | PZE-108018447          | 0.15 | 1.06E-08 | 13.32 |
|      |      | 8  | 169339892 | PZE-108125850          | 0.28 | 1.38E-05 | 8.04  |
|      |      | 9  | 125052653 | PZE-109081255          | 0.14 | 1.30E-05 | 8.15  |
| 6692 | 0.80 | 8  | 169339892 | PZE-108125850          | 0.28 | 6.13E-07 | 11.79 |
| 6716 | 0.86 | 8  | 16788619  | PZE-108016906          | 0.50 | 3.30E-07 | 11.34 |
| 6750 | 0.81 | 6  | 111523070 | SYN20374               | 0.03 | 6.75E-07 | 13.08 |
| 6779 | 0.87 | 1  | 157919581 | PZE-101125090          | 0.40 | 1.42E-05 | 8.33  |
|      |      | 3  | 138478491 | SYN18807               | 0.23 | 8.49E-06 | 8.88  |
|      |      | 4  | 213479432 | PZE-104128161          | 0.04 | 6.63E-06 | 9.61  |
|      |      | 8  | 17706101  | PZE-108018447          | 0.15 | 1.05E-08 | 13.55 |

|      |      |    |           |                        |      |          |       |
|------|------|----|-----------|------------------------|------|----------|-------|
|      |      | 8  | 169339892 | PZE-108125850          | 0.28 | 6.13E-07 | 8.55  |
|      |      | 9  | 125052653 | PZE-109081255          | 0.14 | 1.15E-05 | 8.37  |
| 6860 | 0.79 | 3  | 204973260 | PZE-103153521          | 0.10 | 5.56E-10 | 18.87 |
| 6940 | 0.84 | 1  | 28737820  | PZE-101042039          | 0.32 | 9.15E-06 | 9.13  |
|      |      | 2  | 234576549 | PZE-102194180          | 0.31 | 2.96E-06 | 9.69  |
|      |      | 3  | 68996239  | PZE-103056872          | 0.17 | 1.46E-07 | 14.46 |
|      |      | 7  | 23152493  | PZE-107022749          | 0.10 | 7.78E-06 | 9.14  |
| 7181 | 0.79 | 4  | 33567688  | ZM008854-0420          | 0.02 | 1.65E-06 | 10.79 |
|      |      | 10 | 44140416  | PZE-110026674          | 0.23 | 4.55E-07 | 12.78 |
| 7198 | 0.87 | 1  | 90435505  | SYN12912               | 0.06 | 1.31E-09 | 15.61 |
|      |      | 3  | 220114271 | SYN6966                | 0.10 | 3.31E-07 | 11.11 |
|      |      | 4  | 85049647  | PZE-104050138          | 0.05 | 1.34E-05 | 8.43  |
|      |      | 4  | 132186042 | PZE-104067231          | 0.25 | 1.68E-05 | 9.00  |
|      |      | 5  | 190231321 | SYN38255               | 0.04 | 2.42E-05 | 7.74  |
|      |      | 10 | 41362464  | SYN12445               | 0.06 | 2.17E-08 | 13.62 |
| 7394 | 0.91 | 3  | 203875622 | PZE-103152007          | 0.12 | 4.71E-07 | 11.40 |
| 7440 | 0.90 | 5  | 48391886  | PZE-105053419          | 0.04 | 6.63E-07 | 10.93 |
| 7791 | 0.79 | 5  | 70954831  | SYN30642               | 0.09 | 1.26E-07 | 14.91 |
| 8373 | 0.95 | 2  | 27559497  | ZM008299-0359          | 0.22 | 1.13E-06 | 9.18  |
|      |      | 5  | 66804095  | PZE-105065758          | 0.36 | 8.83E-14 | 23.94 |
|      |      | 6  | 3592683   | PZE-106002606          | 0.12 | 4.30E-06 | 8.54  |
|      |      | 7  | 159557709 | PZE-107118538          | 0.33 | 1.20E-05 | 7.82  |
|      |      | 8  | 79865059  | PZE-108048129          | 0.40 | 6.99E-06 | 8.28  |
| 8637 | 0.89 | 6  | 111523070 | SYN20374               | 0.03 | 7.06E-07 | 10.54 |
| 8765 | 0.92 | 2  | 27559497  | ZM008299-0359          | 0.22 | 4.80E-10 | 15.07 |
|      |      | 5  | 66804095  | PZE-105065758          | 0.36 | 8.44E-18 | 31.37 |
|      |      | 6  | 4612971   | PZE-106003733          | 0.12 | 1.51E-05 | 7.72  |
|      |      | 6  | 23858424  | PZE-106013328          | 0.08 | 8.59E-06 | 8.32  |
| 8791 | 0.91 | 4  | 170780762 | SYNGENTA3398           | 0.04 | 4.69E-07 | 11.10 |
| 8877 | 0.89 | 3  | 8610977   | PZE-103015689          | 0.09 | 2.13E-06 | 9.86  |
|      |      | 3  | 228429469 | SYN1581                | 0.44 | 1.03E-06 | 10.65 |
|      |      | 6  | 105019334 | PZE-106054189          | 0.11 | 1.61E-06 | 9.95  |
| 8901 | 0.91 | 1  | 90435505  | SYN12912               | 0.06 | 5.60E-08 | 11.80 |
|      |      | 8  | 115491648 | PUT-163a-78087243-4204 | 0.39 | 2.08E-09 | 14.37 |
|      |      | 10 | 41362464  | SYN12445               | 0.06 | 5.90E-08 | 11.85 |
| 8913 | 0.88 | 1  | 214330598 | PZE-101171300          | 0.24 | 1.47E-06 | 10.03 |
|      |      | 5  | 202623684 | PZE-105152401          | 0.35 | 1.24E-06 | 10.30 |
| 8961 | 0.86 | 7  | 4035355   | PZE-107005766          | 0.03 | 4.89E-07 | 10.60 |
| 9004 | 0.78 | 2  | 106409512 | PZE-102096043          | 0.03 | 6.80E-08 | 13.36 |
|      |      | 3  | 156153305 | PZE-103097515          | 0.06 | 1.45E-06 | 11.50 |
|      |      | 5  | 141450112 | PZE-105096440          | 0.04 | 3.65E-07 | 13.55 |
|      |      | 7  | 134997749 | SYN17063               | 0.37 | 3.49E-06 | 10.68 |
|      |      | 8  | 115515327 | PZE-108065360          | 0.43 | 4.56E-08 | 14.61 |
| 9005 | 0.65 | 2  | 170884908 | PZE-102124713          | 0.03 | 2.95E-06 | 12.42 |
|      |      | 5  | 86624186  | PZE-105077684          | 0.03 | 1.81E-06 | 13.41 |

|       |      |   |           |               |      |          |       |
|-------|------|---|-----------|---------------|------|----------|-------|
|       |      | 5 | 141450112 | PZE-105096440 | 0.04 | 1.81E-06 | 15.27 |
|       |      | 8 | 115515327 | PZE-108065360 | 0.43 | 1.05E-06 | 14.91 |
| 9215  | 0.93 | 2 | 27559497  | ZM008299-0359 | 0.22 | 2.58E-09 | 14.02 |
|       |      | 5 | 66804095  | PZE-105065758 | 0.36 | 3.06E-15 | 28.35 |
|       |      | 6 | 3592683   | PZE-106002606 | 0.12 | 3.74E-06 | 8.78  |
|       |      | 6 | 23858424  | PZE-106013328 | 0.08 | 3.06E-05 | 7.29  |
| 9245  | 0.95 | 3 | 71549490  | PZE-103057332 | 0.11 | 1.51E-06 | 9.25  |
|       |      | 7 | 23152493  | PZE-107022749 | 0.1  | 2.03E-07 | 11.06 |
| 9296  | 0.95 | 1 | 19193326  | PZE-101031542 | 0.24 | 4.58E-06 | 8.53  |
|       |      | 3 | 8610977   | PZE-103015689 | 0.09 | 7.49E-07 | 10.00 |
|       |      | 6 | 98818869  | PZE-106049605 | 0.24 | 3.22E-07 | 10.84 |
| 9319  | 0.93 | 3 | 8610977   | PZE-103015689 | 0.09 | 7.93E-08 | 11.98 |
|       |      | 3 | 228429469 | SYN1581       | 0.44 | 7.93E-08 | 8.60  |
|       |      | 6 | 98818869  | PZE-106049605 | 0.24 | 2.07E-08 | 13.06 |
| 9356  | 0.80 | 3 | 173118447 | PZE-103114880 | 0.13 | 2.05E-07 | 12.12 |
| 9467  | 0.85 | 3 | 68792482  | PZE-103056787 | 0.18 | 1.04E-07 | 14.40 |
|       |      | 7 | 23152493  | PZE-107022749 | 0.10 | 3.63E-08 | 14.08 |
| 9500  | 0.91 | 2 | 190723090 | PZE-102146567 | 0.33 | 2.08E-06 | 9.04  |
|       |      | 5 | 133758422 | PZE-105093162 | 0.33 | 1.36E-09 | 14.61 |
| 9546  | 0.86 | 3 | 68792482  | PZE-103056787 | 0.18 | 2.56E-07 | 12.97 |
|       |      | 7 | 23152493  | PZE-107022749 | 0.10 | 4.65E-08 | 13.24 |
| 9665  | 0.95 | 7 | 23152493  | PZE-107022749 | 0.10 | 6.10E-07 | 10.29 |
| 9735  | 0.93 | 3 | 8610977   | PZE-103015689 | 0.09 | 8.12E-08 | 12.12 |
|       |      | 3 | 228429469 | SYN1581       | 0.44 | 1.82E-06 | 9.54  |
|       |      | 6 | 98818869  | PZE-106049605 | 0.24 | 6.92E-08 | 12.12 |
| 9832  | 0.86 | 3 | 68792482  | PZE-103056787 | 0.18 | 7.68E-08 | 14.24 |
|       |      | 7 | 23152493  | PZE-107022749 | 0.10 | 8.57E-08 | 12.85 |
| 9848  | 0.89 | 3 | 71549490  | PZE-103057332 | 0.11 | 2.97E-06 | 9.49  |
|       |      | 7 | 23152493  | PZE-107022749 | 0.10 | 5.47E-07 | 11.11 |
| 9883  | 0.88 | 3 | 68792482  | PZE-103056787 | 0.18 | 4.89E-10 | 18.35 |
|       |      | 7 | 23152493  | PZE-107022749 | 0.10 | 3.94E-10 | 16.98 |
| 9959  | 0.85 | 3 | 68792482  | PZE-103056787 | 0.18 | 1.11E-07 | 14.21 |
|       |      | 7 | 23152493  | PZE-107022749 | 0.10 | 2.60E-08 | 14.17 |
| 9981  | 0.92 | 3 | 71549490  | PZE-103057332 | 0.11 | 6.48E-07 | 10.40 |
|       |      | 7 | 23152493  | PZE-107022749 | 0.10 | 9.31E-08 | 11.99 |
| 10057 | 0.93 | 4 | 184791719 | SYN3148       | 0.47 | 4.47E-07 | 10.04 |
| 10099 | 0.87 | 3 | 68792482  | PZE-103056787 | 0.18 | 4.48E-09 | 16.52 |
|       |      | 7 | 23152493  | PZE-107022749 | 0.10 | 1.50E-08 | 14.23 |
| 10122 | 0.90 | 3 | 68792482  | PZE-103056787 | 0.18 | 1.74E-08 | 14.66 |
|       |      | 7 | 23152493  | PZE-107022749 | 0.10 | 1.43E-08 | 13.84 |
| 10224 | 0.88 | 3 | 68792482  | PZE-103056787 | 0.18 | 3.94E-09 | 16.92 |
|       |      | 7 | 23152493  | PZE-107022749 | 0.10 | 6.78E-10 | 16.95 |
| 10237 | 0.91 | 3 | 68792482  | PZE-103056787 | 0.18 | 5.06E-10 | 17.39 |
|       |      | 7 | 23152493  | PZE-107022749 | 0.10 | 4.64E-10 | 15.99 |
